1 ***In vitro* evolution of colistin resistance in the *Klebsiella pneumoniae* complex follows multiple**  
2 **evolutionary trajectories with variable effects on fitness and virulence characteristics.**

3

4 Axel B. Janssen<sup>a</sup>, Dennis J. Doorduyn<sup>a</sup>, Grant Mills<sup>b</sup>, Malbert R.C. Rogers<sup>a</sup>, Marc J.M. Bonten<sup>a</sup>, Suzan  
5 H.M. Rooijackers<sup>a</sup>, Rob J.L. Willems<sup>a</sup>, Jose A. Bengoechea<sup>b</sup>, Willem van Schaik<sup>a,c</sup>

6

7 <sup>a</sup> Department of Medical Microbiology, University Medical Center Utrecht, Utrecht University, Utrecht,  
8 The Netherlands.

9 <sup>b</sup> Wellcome-Wolfson Institute for Experimental Medicine, Queen's University Belfast, Belfast, United  
10 Kingdom.

11 <sup>c</sup> Institute of Microbiology and Infection, College of Medical and Dental Sciences, University of  
12 Birmingham, Birmingham, United Kingdom.

13

14 Running title: colistin resistance in *Klebsiella*

15 # Address correspondence to Willem van Schaik, [w.vanschaik@bham.ac.uk](mailto:w.vanschaik@bham.ac.uk).

16

17

18

## 19 Abstract

20 The increasing prevalence of multidrug-resistant Gram-negative opportunistic pathogens,  
21 including *Klebsiella pneumoniae*, has led to a resurgence in the use of colistin as a last-resort drug.  
22 Colistin is a cationic lipopeptide antibiotic that selectively acts on Gram-negative bacteria through  
23 electrostatic interactions with anionic phosphate groups of the lipid A moiety of lipopolysaccharides  
24 (LPS). Colistin resistance in *K. pneumoniae* is mediated through loss of these phosphate groups, or  
25 modification with cationic groups (e.g. 4-amino-4-deoxy-L-arabinose (L-Ara4N), or  
26 phosphoethanolamine), but also hydroxylation of acyl-groups of lipid A. Here, we study the *in vitro*  
27 evolutionary trajectories towards colistin resistance in clinical *K. pneumoniae* complex strains (three  
28 *K. pneumoniae sensu stricto* strains and one *K. variicola* subsp. *variicola* strain) and their impact on  
29 fitness and virulence characteristics.

30 Through population sequencing during the *in vitro* evolution experiment, we found that resistance  
31 develops through a combination of single nucleotide polymorphisms (SNPs), insertion and deletions  
32 (indels), and the integration of insertion sequence (IS) elements, affecting genes associated with LPS  
33 biosynthesis and modification, and capsule structures. The development of colistin resistance decreased  
34 the maximum growth rate of one *K. pneumoniae sensu stricto* strain, but not in the other three  
35 *K. pneumoniae sensu lato* strains. Colistin-resistant strains had lipid A modified through hydroxylation,  
36 palmitoylation, and L-Ara4N addition. Colistin-resistant *K. pneumoniae sensu stricto* strains exhibited  
37 cross-resistance to LL-37, in contrast to the *K. variicola* subsp. *variicola* strain that did not change in  
38 susceptibility to LL-37. Virulence, as determined in a *Caenorhabditis elegans* survival assay, was higher  
39 in two colistin-resistant strains.

40 Our study suggests that nosocomial *K. pneumoniae* complex strains can rapidly develop colistin  
41 resistance *de novo* through diverse evolutionary trajectories upon exposure to colistin. This effectively

42 shortens the lifespan of this last-resort antibiotic for the treatment of infections with multidrug-resistant

43 *Klebsiella*.

44

45 **Author summary**

46 Bacteria that frequently cause infections in hospitalised patients are becoming increasingly  
47 resistant to antibiotics. Colistin is a positively charged antibiotic that is used for the treatment of  
48 infections with multidrug-resistant Gram-negative bacteria. Colistin acts by specifically interacting with  
49 the negatively charged LPS molecule in the outer membrane of Gram-negative bacteria. Colistin  
50 resistance is mostly mediated through modification of LPS to reduce its negative charge. Here, we use a  
51 laboratory evolution experiment to show that strains belonging to the *Klebsiella pneumoniae* complex, a  
52 common cause of multidrug-resistant hospital-acquired infections, can rapidly accumulate mutations that  
53 reduce the negative charge of LPS without an appreciable loss of fitness. Colistin resistance can lead to  
54 cross-resistance to an antimicrobial peptide of the human innate immune system, but can increase  
55 susceptibility to serum, and virulence in a nematode model. These findings show that extensively resistant  
56 *K. pneumoniae* complex strains may rapidly develop resistance to the last-resort antibiotic colistin via  
57 different evolutionary trajectories, while retaining their ability to cause infections.

58

## 59 Introduction

60 *Klebsiella pneumoniae* is a Gram-negative opportunistic pathogen and a leading cause of  
61 hospital-associated infections such as pneumonia, soft tissue infections, and urinary tract infections.  
62 *K. pneumoniae* may also asymptotically colonize the skin, upper respiratory tract, and digestive tract  
63 of healthy individuals [1,2]. The *K. pneumoniae* complex is genetically diverse, with different  
64 phylogroups within the complex corresponding to different species and sub-species, each occupying  
65 specific niches [1,2]. The *K. pneumoniae sensu stricto* and *K. quasipneumoniae* phylogroups are  
66 associated with human intestinal carriage, whilst the *K. variicola* phylogroup is associated with plants and  
67 bovine carriage [1,3]. Of all strains isolated from human infections and typed as *K. pneumoniae*, the  
68 majority is *K. pneumoniae sensu stricto*, but *K. variicola* and *K. quasipneumoniae* have also been found  
69 to cause infections in patients and are frequently misidentified as *K. pneumoniae* [4,5]. Although  
70 infections with strains from the *K. variicola* phylogroup are relatively rare, they have been associated  
71 with the highest mortality rate within the *K. pneumoniae* complex [3].

72 In recent years, *K. pneumoniae* complex strains have rapidly emerged as multidrug-resistant  
73 pathogens through acquisition of resistance to third-generation cephalosporins, fluoroquinolones, and  
74 aminoglycosides, and have increasingly become resistant to carbapenems through the acquisition of  
75 carbapenemases [6–9]. The increasing prevalence of multidrug resistance within the *K. pneumoniae*  
76 complex, and the lack of development of novel antibiotic classes effective against Gram-negative  
77 bacteria, have limited the available therapeutic options against multidrug-resistant *K. pneumoniae*  
78 complex strains. These limitations have prompted the resurgence in the use of the antibiotic colistin in  
79 treatment of infections by *K. pneumoniae* complex strains [10–13]. After its introduction into clinical  
80 practice in the 1950s, colistin fell into disuse in human medicine in the 1970s because of the neuro- and  
81 nephrotoxic side effects associated with its use, and the development of safer classes of antibiotics. Due to  
82 the emergence multidrug-resistant Gram-negative opportunistic pathogens, like *K. pneumoniae*, it has  
83 recently regained clinical relevance as a last-line antibiotic [13–16].

84 Colistin (polymyxin E) is a cationic, amphipathic molecule composed of a fatty acid chain linked  
85 to a non-ribosomally synthesized decapeptide [17,18]. The mechanism of action of colistin relies on the  
86 selective presence of the negatively charged lipopolysaccharides (LPS) in the membranes of  
87 Gram-negative bacteria. The negative charges of LPS are carried by the anionic phosphate groups of the  
88 lipid A moiety of LPS, which enable colistin to bind through electrostatic interactions [17–20]. Insertion  
89 of colistin into the outer membrane leads to membrane permeabilization. The subsequent destabilization  
90 of the cytoplasmic membrane, where LPS is present after synthesis in the cytoplasm while awaiting  
91 transport to the outer membrane, ultimately leads to cell death [17,19,21,22].

92 The increased use of colistin to treat infections with multidrug-resistant Gram-negative bacteria,  
93 especially in low- and middle-income countries [13], and the use of colistin in livestock farming, either  
94 therapeutically to treat enteric infections or as a growth promoter [23,24], has led to a rise in colistin  
95 resistance in *K. pneumoniae* from clinical, veterinary, and environmental sources [9,25–29]. Colistin  
96 resistance in *K. pneumoniae* complex strains is mostly mediated through decoration of lipid A with  
97 cationic groups, to counteract the electrostatic interactions between colistin and lipid A [17]. These  
98 modifications can be the result of point mutations and indels in chromosomally located genes (including  
99 *phoPQ*, *pmrAB*, and *crrAB*) resulting in amino acid substitutions and frameshift mutations, respectively.  
100 In addition, the acquisition of mobile genetic elements carrying a member of the *mcr*-gene family may  
101 also lead to lipid A modification [30–35]. In *K. pneumoniae*, the inactivation of *mgrB* encoding an  
102 negative regulator of PhoPQ, through the insertion of an insertion sequence (IS) element, or a mutation  
103 leading to the formation of a premature stop codon, is a particularly frequently observed colistin  
104 resistance mechanism [25,36–41]. Other mechanisms of colistin resistance in *K. pneumoniae* include the  
105 upregulated expression of efflux pumps [42,43], changes in LPS production [25,44], and the  
106 overproduction of capsular polysaccharides [45,46].

107 Upon infection the innate immune system will attempt to neutralize invading bacteria. The  
108 cellular components of the innate immune system can detect Gram-negative bacteria through the presence

109 of LPS [47]. Activated immune cells can kill bacteria and will attempt to kill them by unleashing  
110 bactericidal components including the antimicrobial peptide LL-37. Similar to colistin, LL-37 relies on  
111 electrostatic interactions with LPS for its mechanism of action [48]. Modifications to LPS may influence  
112 the efficacy of bactericidal components, and may thus result in altered virulence by reducing the  
113 effectiveness of these components [47–51]. Modifications capable of affecting the efficiency of the  
114 immune system include neutralization of the anionic charges carried by lipid A, and changes in acylation  
115 of lipid A [47,49,50,52]. These changes are mediated through the PhoPQ and PmrAB two-component  
116 regulatory systems. Notably, colistin resistance is mediated through the same modifications and  
117 two-component regulatory systems. The development of colistin resistance may thus also affect virulence  
118 characteristics.

119 To better understand the mechanisms and consequences of colistin resistance in *K. pneumoniae*  
120 complex strains, we determined the evolutionary trajectories of three *K. pneumoniae sensu stricto* strains  
121 and one *K. variicola* subsp. *variicola* strain towards colistin resistance in an *in vitro* evolution experiment,  
122 and determined how colistin resistance impacted fitness, LPS modifications, and virulence characteristics.

123

## 124 **Materials and Methods**

### 125 **Ethical statement**

126 The colistin-susceptible *K. pneumoniae* complex strains used in this study were isolated as part of  
127 routine diagnostic procedures, which did not require consent or ethical approval by an institutional review  
128 board.

129

### 130 **Bacterial strains, growth conditions, and chemicals**

131 The colistin-susceptible KP209, KP040, KP257, and KV402 strains were retrospectively,  
132 obtained from the diagnostic laboratory of the University Medical Center Utrecht in Utrecht, the  
133 Netherlands. In initial routine diagnostic procedures, they were identified as *K. pneumoniae sensu stricto*  
134 by matrix-assisted laser desorption–ionisation time-of-flight (MALDI-TOF) on a Bruker microflex  
135 system (Leiderdorp, The Netherlands). Colistin susceptibility testing of the clinical isolates was initially  
136 performed on a BD Phoenix automated identification and susceptibility testing system (Becton Dickinson,  
137 Vianen, The Netherlands). All strains were grown either in lysogeny broth (LB; Oxoid, Landsmeer, The  
138 Netherlands) with agitation at 300 rpm, or on LB agar, at 37°C, unless otherwise specified. Colistin  
139 sulphate was obtained from Duchefa Biochemie (Haarlem, The Netherlands).

140

### 141 **Determination of minimal inhibitory concentration of colistin**

142 Minimal inhibitory concentrations (MICs) to colistin were determined as described previously  
143 [53] in line with the recommendations from the joint Clinical & Laboratory Standards Institute and  
144 European Committee on Antimicrobial Susceptibility Testing (EUCAST) Polymyxin Breakpoints  
145 Working Group

Group



146 [http://www.eucast.org/fileadmin/src/media/PDFs/EUCAST\\_files/General\\_documents/Recommendations](http://www.eucast.org/fileadmin/src/media/PDFs/EUCAST_files/General_documents/Recommendations)  
147 [for MIC determination of colistin March 2016.pdf](http://www.eucast.org/fileadmin/src/media/PDFs/EUCAST_files/General_documents/Recommendations_for_MIC_determination_of_colistin_March_2016.pdf)). In short, colistin susceptibility testing was  
148 performed using BBL™ Mueller Hinton II (cation-adjusted) broth (MHCAB; Becton Dickinson),  
149 untreated Nunc 96-wells round bottom polystyrene plates (Thermo Fisher Scientific, Landsmeer, The  
150 Netherlands), and Breathe-Easy sealing membranes (Sigma-Aldrich, Zwijndrecht, The Netherlands). The  
151 MIC was observed after stationary, overnight growth at 37°C, and was determined to be the lowest  
152 concentration where no visible growth was observed. The breakpoint value for colistin resistance of an  
153 MIC >2 µg/ml was obtained from EUCAST [54] ([http://www.eucast.org/clinical\\_breakpoints/](http://www.eucast.org/clinical_breakpoints/)).

154

#### 155 ***In vitro* evolution of colistin resistance**

156 The nosocomial, colistin-susceptible *K. pneumoniae* strains were evolved towards colistin  
157 resistance by culturing in increasing colistin concentrations over a period of 5-7 days. Prior to the *in vitro*  
158 evolution experiments, MICs to colistin were determined in LB. Each strain was grown in 1 ml LB with  
159 initial colistin concentrations of 1 and 2 times the MIC. After overnight growth, 1 µl of the cultures with  
160 the highest concentration of colistin that had visible growth were used to propagate a fresh culture by  
161 inoculating 1 ml of fresh LB, supplemented with the same or twice the concentration of colistin in which  
162 growth was observed in the previous day's culture (Supplemental Figure S1). This process was repeated  
163 for 5-7 days. Each overnight culture was stored at -80°C in 20% glycerol.

164

#### 165 **Genomic DNA isolation and whole-genome sequencing**

166 Genomic DNA was isolated using the Wizard Genomic DNA purification kit (Promega, Leiden,  
167 The Netherlands) according to the manufacturer's instructions. DNA concentrations were measured with

168 the Qubit 2.0 fluorometer and the Qubit dsDNA Broad Range Assay kit (Life Technologies, Bleiswijk,  
169 The Netherlands).

170 Illumina sequence libraries of genomic DNA were prepared using the Nextera XT kit (Illumina,  
171 San Diego, CA) according to the manufacturer's instructions, and sequenced on an Illumina MiSeq  
172 system with a 500-cycle ( $2 \times 250$  bp) MiSeq v2 reagent kit (Illumina). MinION library preparation for  
173 barcoded 2D long-read sequencing was performed using the SQK-LSK208 kit (Oxford Nanopore  
174 Technologies, Oxford, England, United Kingdom), according to the manufacturer's instructions, with  
175 G-tube (Covaris, Woburn, Massachusetts, United States of America) shearing of chromosomal DNA for 2  
176 x 120 seconds at 1500 g. The libraries were sequenced on a MinION sequencer (Oxford Nanopore  
177 Technologies) through a SpotON Flow Cell Mk I (R9.4; Oxford Nanopore Technologies).

178

### 179 **Genome assembly and annotation**

180 The quality of the Illumina sequencing data was assessed using FastQC v0.11.5  
181 (<https://github.com/s-andrews/FastQC>). Illumina sequencing reads were trimmed for quality using nelsoni  
182 v0.115 (<https://github.com/Victorian-Bioinformatics-Consortium/nesoni>) using standard settings with the  
183 exception of a minimum read length of 100 nucleotides. MinION reads in FastQ format were extracted  
184 from Metrichor base-called FAST5-files using Poretools [55]. *De novo* genome hybrid assembly of  
185 colistin-susceptible strains was performed using Illumina and Oxford Nanopore data using SPAdes v3.6.2  
186 with the following settings: kmers used: 21, 33, 55, 77, 99, 127, “careful” option turned on and cut-offs  
187 for final assemblies: minimum contig/scaffold size of 500bp, and a minimum average scaffold nucleotide  
188 coverage of 10 [56,57]. Genome annotation was performed using Prokka [58].

189

### 190 **Phylogenetic analysis, MLST typing, and identification of antibiotic resistance genes**

191 To generate a core genome phylogeny, Illumina/Oxford Nanopore hybrid genome assemblies  
192 were aligned using ParSNP v1.2 (37) with 37 publicly available *Klebsiella pneumoniae* complex genomes  
193 that cover all phylogroups of the *K. pneumoniae* complex [2]. To include the genome of *K. africanensis*  
194 strain 38679, we assembled the genome from raw reads, by processing the raw sequence reads using  
195 Nsoni with standard settings, except for minimum read length (75 nucleotides), and subsequent assembly  
196 by SPAdes with kmers 21, 33, 55, 77 and the “careful” options turned on.

197 Figtree was used to visualize and midpoint root the phylogenetic tree (<http://tree.bio.ed.ac.uk/>).  
198 MLST typing was performed using the mlst package v2.10 (<https://github.com/tseemann/mlst>). Genome  
199 assemblies of colistin-susceptible strains were assessed for antibiotic resistance genes by ResFinder 3.1  
200 through standard settings [59].

201  
202 **Determination of SNPs and indels between axenic colistin-susceptible and colistin-resistant strain**  
203 **pairs.**

204 Read-mapping of Nsoni-filtered reads of evolved strains to the genomes of the isogenic  
205 colistin-susceptible parental strains was performed using Bowtie2 [60]. SNP and indel-calling was  
206 performed using SAMtools 0.1.18 using the following settings: Qscore  $\geq$  50, mapping quality  $\geq$  30, a  
207 mapping depth  $\geq$  10 reads, a consensus of  $\geq$  75% to support a call, and  $\geq$  1 read in each direction  
208 supporting a mutation, as previously described [61]. To correct for potential assembly errors, we also  
209 performed the SNP and indel-calling procedure by mapping the reads of the reference isolates against  
210 their own assemblies. SNPs and indels found in the reference-versus-reference comparison were ignored  
211 in query-versus-reference comparisons. Synonymous mutations were excluded from further analyses.  
212 SNPs and indels were manually linked to genes in the assembly.

213

## 214 **Determination of location of IS elements in genomes**

215 To determine which IS elements were present in the genomes of colistin-susceptible strains, we  
216 analysed the Illumina/Oxford Nanopore hybrid genome assemblies using ISfinder [62]. Per genome, the  
217 IS elements with an E-value  $< 1e-50$  were selected for further study. If multiple distinct IS elements were  
218 called at the same position, the element with the highest sequence identity was selected to represent that  
219 position.

220 To detect changes in the position of the identified IS elements, we analysed the genomic  
221 assemblies of the isogenic colistin-susceptible and colistin-resistant strain pairs through ISMapper [63].  
222 To maximize the ability of ISMapper to detect IS elements in our sequencing data, the obtained  
223 nucleotide sequences of the IS elements in the genome were used as input, and the --cutoff flag of  
224 ISMapper was set to 1, whilst other settings remained unchanged. The results were inspected for IS  
225 elements that had different positions between the colistin-susceptible, and colistin-resistant strains.  
226 Insertion of IS elements was confirmed through PCRs, using DreamTaq Green PCR Master Mix (Thermo  
227 Fisher Scientific) and primers spanning the IS insertion site (Supplemental Table S1) and subsequent  
228 Sanger sequencing of the PCR product by Macrogen (Amsterdam, The Netherlands).

229

## 230 **SNP and indel calling in evolving populations.**

231 To track the genomic changes within the growing cultures under the selective pressure of  
232 increasing colistin concentrations, genomic DNA was isolated from the 5-7 overnight cultures of each  
233 *in vitro* evolution experiment and sequenced on the Illumina MiSeq platform as described above. SNPs  
234 and indels were called as before, with each call supported by at least 25% of reads. Once identified in one  
235 or more populations, the abundance of the specific SNPs and indels were then quantified manually for all  
236 individual populations of the *in vitro* evolution experiment. Mutations called within 150 bp of a contig  
237 end were filtered out, as previously recommended [64]. Identified SNPs and indels were manually linked

238 to genes in the genome assembly, and inspected for synonymous versus non-synonymous mutations.  
239 Non-coding mutations were included in subsequent analyses, while synonymous mutations were  
240 excluded.

241

#### 242 **Determination of growth rate**

243 To determine the maximum specific growth rate, a Bioscreen C instrument (Oy Growth Curves  
244 AB, Helsinki, Finland) was used. Overnight cultures were used to inoculate 200 µl fresh LB medium  
245 1:1000. Incubation was set at 37°C with continuous shaking. Growth was observed by measuring the  
246 absorbance at 600 nm every 7.5 minutes. Each experiment was performed in triplicate.

247

#### 248 **MALDI-TOF analysis of lipid A structures**

249 Isolation of lipid A molecules and subsequent analysis by negative-ion matrix-assisted laser  
250 desorption–ionisation time-of-flight (MALDI-TOF) mass spectrometry was performed as previously  
251 described [41,65,66]. Briefly, *K. pneumoniae* strains were grown in LB (Oxoid) and the lipid A was  
252 purified from stationary cultures using the ammonium hydroxide/isobutyric acid isolation method  
253 described earlier [67]. Mass spectrometry analysis were performed on a Bruker autoflex® speed  
254 TOF/TOF mass spectrometer in negative reflective mode with delayed extraction using as matrix an equal  
255 volume of dihydroxybenzoic acid matrix (Sigma-Aldrich) dissolved in (1:2) acetonitrile-0.1%  
256 trifluoroacetic acid. The ion-accelerating voltage was set at 20 kV. Each spectrum was an average of 300  
257 shots. A peptide calibration standard (Bruker) was used to calibrate the MALDI-TOF. Further calibration  
258 for lipid A analysis was performed externally using lipid A extracted from *Escherichia coli* strain  
259 MG1655 grown in LB medium at 37°C.

260

261 **LL-37 survival assay**

262 In order to test the susceptibility of the *K. pneumoniae* strains to LL-37, we adapted previously  
263 described protocols [68]. An overnight broth culture was diluted to a concentration of  $2.5 \times 10^6$  CFU/ml in  
264 25% LB and incubated with or without the addition of 50  $\mu$ g/ml LL-37 (AnaSpec Inc, Ferment,  
265 California, United States of America) for 90 minutes at 37°C with agitation at 300 rpm in sterile  
266 round-bottom 96-well plates (Greiner Bio-One, Alphen aan den Rijn, The Netherlands). After incubation,  
267 samples were serially diluted in PBS and plated on LB agar plates. CFUs were counted after overnight  
268 incubation at 37°C.

269

270 ***Caenorhabditis elegans* virulence assays**

271 *Caenorhabditis elegans* strain CF512 (*rrf-3(b26) II*; *fem-1(hc17) IV*), which has a  
272 temperature-sensitive reproduction defect, was obtained from the Caenorhabditis Genetics Center at the  
273 University of Minnesota, Twin Cities (<http://www.cgcb.umn.edu>). CF512 nematodes were maintained  
274 at 20°C on Nematode Growth Medium (NGM) agar plates seeded with *E. coli* OP50 [69], and placed on  
275 fresh plates at least once per week. For seeding of NGM plates, mid-exponential phase cultures were  
276 used. After reaching mid-exponential phase, the cells were washed with PBS, and  $1 \times 10^6$  CFU were  
277 spread on NGM plates, after which the bacterial lawns were grown overnight at 37°C.

278 To quantify bacterial virulence, *C. elegans* CF512 lifespan assays were performed with  
279 synchronized nematodes according to a previously described protocol [70]. For synchronization,  
280 nematodes and eggs were collected from a NGM plate in ice-cold filter-sterilized M9 medium, and  
281 washed by spinning at 1500 x g for 30 seconds [71]. Nematodes were destructed by vigorous vortexing in  
282 hypochlorite solution (25 mM NaOH, 1.28% sodium hypochlorite) for two minutes, after which the  
283 reaction was stopped by the addition of M9 medium. Eggs were allowed to hatch on NGM plates seeded  
284 with *E. coli* OP50 for 6-8 hours at 20°C, after which they were placed at 25°C to avoid progeny. After 48

285 hours, L3-L4 nematodes were placed on NGM plates (n=40 per plate) seeded with bacterial strains. Plates  
286 were scored for live nematodes. Nematodes were considered dead when they did not show spontaneous  
287 movement or a response to external stimuli.

288

## 289 **Statistical analysis**

290 Statistical analyses were performed using the parametric one-way ANOVA test with a Dunnett's  
291 test for multiple comparisons (for the determination of maximum growth rates), the non-parametric  
292 Mann-Whitney test was used (for the LL-37 survival assay), the parametric one-way ANOVA test with a  
293 Sidak's test for multiple comparisons (for the serum survival assays), and the Mantel-Cox log-rank test  
294 (for the *C. elegans* assays). Statistical significance was defined as a p-value < 0.05 for all tests. Statistical  
295 analyses were performed using GraphPad Prism 6 software (GraphPad Software, San Diego, California,  
296 United States of America).

297

## 298 **Data availability**

299 Sequence data of both the Illumina short-read, and the Oxford Nanopore long-read sequencing  
300 has been deposited in the European Nucleotide Archive (accession number PRJEB29521).

301

## 302 **Results**

### 303 **The colistin-susceptible *K. pneumoniae* complex strains have a diverse genetic background**

304 The four clinical isolates used in this study were obtained from pus, faecal, or urine samples  
305 through routine diagnostic procedures in September 2013. All four strains were initially typed as  
306 *K. pneumoniae sensu stricto* through routine diagnostic procedures using MALDI-TOF. The  
307 susceptibility to colistin of these strains, previously determined in routine diagnostic procedures, was  
308 confirmed through antibiotic susceptibility testing using broth microdilution (Figure 1A).

309 The sequenced genomes of the colistin-susceptible strains were screened for acquired antibiotic  
310 resistance genes through ResFinder 3.1 (Figure 1B). None of the nosocomial strains was determined to  
311 carry one of the *mcr*-genes. Between two and five acquired antibiotic resistance genes were observed in  
312 the genome assemblies, encoding resistance to beta-lactams, quinolones, and fosfomycin.

313 To accurately identify the phylogenetic position of these nosocomial strains within the  
314 *K. pneumoniae* complex, a phylogenetic tree was generated based on the Illumina/Oxford Nanopore  
315 hybrid genome assemblies of the colistin-susceptible strains, and 37 publicly available genomes covering  
316 all phylogroups in the *K. pneumoniae* complex [2]. Based on a 1.3 Mbp core-genome alignment, the  
317 phylogenetic tree showed that strains KP209, KP040, and KP257 clustered in the *K. pneumoniae sensu*  
318 *stricto* (KpI) phylogroup (Figure 1C). Strain KV402 clustered in the *K. variicola* subsp. *variicola* (KpIII)  
319 phylogroup, even though it had been typed as *K. pneumoniae sensu stricto* through MALDI-TOF during  
320 initial routine diagnostic procedures.

321

### 322 **Colistin resistance emerges through multiple evolutionary trajectories in the *K. pneumoniae*** 323 **complex**



324 In an effort to understand the evolutionary trajectories through which the *K. pneumoniae* complex  
325 strains evolved resistance towards colistin, we deep-sequenced each overnight culture of the *in vitro*  
326 evolution experiment (Supplemental Table S2), in which the strains were grown in the presence of  
327 increasing concentrations of colistin and identified SNP, indels and excision/integration events of IS  
328 elements.

329 Through these methods, we observed the rapid emergence and fixation of several mutations  
330 (Figure 2) in the presence of colistin. In three strains (KP209, KP257, and KV402), these mutations  
331 occurred in the genes encoding the PhoPQ two-component regulatory system after one day of culturing  
332 (Supplemental Table S3). The PhoPQ two-component regulatory system is a well-known mediator of  
333 colistin resistance in *K. pneumoniae* complex strains [30,72]. The G385S substitution identified in PhoQ  
334 of KP257 has been previously linked to colistin resistance [73], and the other mutations in *phoPQ*  
335 presumably confer colistin resistance to these strains as well. In strain KP040, we observed the integration  
336 of an IS5 element (Supplemental Table S4, Supplemental Data 1) in the promoter region of both the  
337 *ccrAB* operon, which encodes a two-component regulatory system, that has previously been linked to  
338 colistin resistance [31], and the CrrAB-controlled *crrC* gene, which encodes an activator of the PmrAB  
339 two-component regulatory system [74]. In addition, an intergenic SNP (located in promoter regions of  
340 *ecpR* or *phnC*) in strain KP040 became fixed in the population on the first day of culturing. Both EcpR  
341 and PhnC have not previously been associated with colistin resistance. Although other mutations, in other  
342 locations, also occurred during the first day of culturing, these mutations failed to become fixed in the  
343 population, and were either lost on subsequent days, or did not change in abundance over time.

344 On subsequent days of the *in vitro* evolution experiment, novel mutations in the populations were  
345 associated with additional increases in MIC of colistin. New SNPs that were fixed in the populations were  
346 observed in *phoQ* (strain KP209 (day 5), and KV402 (day 6)), and *pmrB* (KP209 (day4)). In strain  
347 KP257, a SNP in *lptD* was first observed on day 3, and was then fixed in the population. The *lptD* gene  
348 encodes a barrel-shaped transporter that transports LPS onto the outer leaflet of the outer membrane.

349 Mutations in genes located in the K-locus, involved in capsule synthesis, were also detected. In strain  
350 KV402 a 13-bp deletion was observed in *wcaJ* from day 3 onwards, leading to a premature stop-codon. In  
351 KP040 a new insertion of *IS102*, inactivating *wzc* was observed from day 4. In addition, a 12-bp insertion  
352 in the gene encoding the Rho transcription termination factor was observed in KP040. We did not observe  
353 any mutations in the *mgrB* gene, encoding the negative regulator of the PhoPQ two-component regulatory  
354 system, in these *in vitro* evolution experiments.

355

### 356 ***K. pneumoniae* can rapidly develop colistin resistance without loss of fitness.**

357 To characterize changes in fitness and virulence characteristics as a result of development of  
358 colistin resistance, we isolated an axenic strain on each day of the *in vitro* evolution experiments. The  
359 genome sequences of the axenic strains of the last day of the *in vitro* evolution experiments were  
360 determined by Illumina sequencing. SNPs, indels and IS element insertions were identified in these  
361 strains in comparison with the colistin-susceptible parental strain. After combining these data with the  
362 population sequencing data described above, we determined the presence of these mutations in the axenic  
363 strains isolated after each day of the *in vitro* evolution experiment by targeted PCRs and Sanger  
364 sequencing of the amplicons. We were thus able to correlate the occurrence of mutations with increases in  
365 the MIC of colistin in each strain.

366 All four strains developed levels of resistance to colistin above the breakpoint value after one  
367 overnight incubation of the colistin-susceptible strain in the presence of the antibiotic (Figure 2). The  
368 initial mutations in *phoPQ* were associated with an increase in MIC in strains KP209, KP257, and KV402  
369 (Figure 2). The integration of the *IS5* element in the promoter region of *crrAB* and *crrC*, and the  
370 appearance of an intergenic SNP between *ecpR* and *phnC*, also occur simultaneously with an increase in  
371 the MIC of colistin. The additional SNP in *phoQ* in KP209 was not associated with an increase in the  
372 MIC of colistin. Integration of *IS102* in *wzc* of the K-locus, as well as the 12-bp insertion in the gene

373 encoding the transcription termination factor Rho, was associated with an additional increase in the MIC  
374 of colistin in strain KP040. The SNP in *lptD* in strain KP257 did not lead to a meaningful increase in the  
375 MIC of colistin. The culture isolated from the last day of the KV402 *in vitro* evolution experiments had a  
376 SNP in *yciM* (Supplemental Table S5), encoding a negative regulator of LPS biosynthesis, but this did not  
377 contribute to a further reduced susceptibility to colistin.

378         The measurement of the maximum growth rate as a proxy for general fitness of the axenic strains  
379 isolated on the different days of the *in vitro* evolution experiment showed that the increase in MIC of  
380 colistin to values above 2 µg/ml after one overnight incubation, did not negatively affect the maximum  
381 growth rate for strains KP209, KP040, and KV402. Only the initial increase in MIC of colistin in strain  
382 KP257 had a negative impact on the maximum growth rate, decreasing the maximum growth rate by 37%  
383 (Figure 3). Over time, the maximum growth rates of strains KP209 and KV402 decreased 13.4% and  
384 9.5%, respectively, compared to the maximum growth rate of the colistin-susceptible strain. In strain  
385 KP040, an increase of 10.0% in maximum growth rate was observed during the course of the *in vitro*  
386 evolution experiment.

387

388 **Colistin-resistant *K. pneumoniae* complex strains have lipid A that is modified through**  
389 **hydroxylation, palmitoylation and addition of 4-amino-4-deoxy-L-arabinose (L-Ara4N)**

390         To determine the modifications to lipid A in the colistin-resistant strains, we performed  
391 MALDI-TOF analysis on lipid A isolated from the colistin-susceptible strain, and the axenic strain of the  
392 last day of the *in vitro* evolution experiments. The MALDI-TOF spectra of lipid A isolated from  
393 colistin-susceptible strains (Figure 4A), showed a dominant peak from hexa-acylated lipid A  
394 (mass-to-charge ratio (*m/z*) 1824), corresponding to two glucosamines, two phosphates, four 3-OH-C<sub>14</sub>  
395 and two C<sub>14</sub> acyl chains [65]. Additional minor peaks in the MALDI-TOF spectrum of the susceptible  
396 strains could be observed at *m/z* 1840, corresponding to the hydroxylation (*m/z* 16) of one of the C<sub>14</sub>

397 acyl-groups of hexa-acylated lipid A ( $m/z$  1824), and at  $m/z$  2063 (in KP209 and KP257), corresponding  
398 to a hepta-acylated lipid A, with an additional acylation of lipid A ( $m/z$  1824) with a palmitoyl group ( $m/z$   
399 239).

400 All the MALDI-TOF spectra of lipid A isolated from colistin-resistant strains show additional  
401 peaks (Figure 4B), indicating the modification of their lipid A. In the spectra of colistin-resistant KP209  
402 and KV402, lipid A  $m/z$  1955 was observed, indicating addition of L-Ara4N ( $m/z$  131) to the  
403 hexa-acylated lipid A  $m/z$  1824. In colistin-resistant KV402 lipid A  $m/z$  1850 was observed, consistent  
404 with hexa-acylated lipid A  $m/z$  1824 with one C<sub>16</sub> acyl chain (Figure 4C). The peak at  $m/z$  1866 in the  
405 MALDI-TOF spectra of colistin-resistant KP040 and KP257 was consistent with hydroxylation of lipid A  
406  $m/z$  1850.

407

#### 408 **Development of colistin resistance is associated with increased LL-37 resistance and virulence in a** 409 ***C. elegans* survival model.**

410 Since the mechanisms of LPS modification that result in colistin resistance and immune evasion  
411 are similar [75], we investigated the effects of colistin resistance on virulence characteristics. Since LL-37  
412 is a human cathelicidin antimicrobial peptide, it has a similar mechanism of action as colistin. Previously,  
413 cross-resistance between colistin and LL-37 was observed in *Acinetobacter baumannii* [68]. To assess the  
414 possible cross-resistance between colistin and LL-37, we determined the survival of the colistin-resistant  
415 strains under influence of LL-37. We observed that three of the four colistin-resistant strains (KP209,  
416 KP040, and KP257) showed a decreased susceptibility to killing by LL-37 compared to their  
417 colistin-susceptible parental strains (Figure 5). In contrast, development of colistin resistance in strain  
418 KV402 did not affect susceptibility to LL-37.

419 To investigate the possible consequences of colistin resistance on virulence, we exposed the  
420 nematode *C. elegans* strain CF512 to the colistin-susceptible/resistant strain pairs. *C. elegans* had a

421 decreased lifespan on a lawn of colistin-resistant KP209 (Figure 6) and KP040, compared to their  
422 colistin-susceptible strains. Survival of *C. elegans* was not affected by growth on colistin-resistant strains  
423 derived from KP257 and KV402, compared to the colistin-susceptible parental strains.

424

## 425 Discussion

426 Colistin plays a pivotal role in public health due to its last-resort status for treatment of infections  
427 with multidrug-resistant Gram-negative bacteria. The increasing number of reports of *K. pneumoniae*  
428 strains that have acquired resistance to multiple antibiotics, including colistin, is thus a cause for  
429 increasing concern [7–9,29]. In this study, we observed the swift development of colistin resistance  
430 through diverse evolutionary trajectories by conducting an *in vitro* evolution experiment with nosocomial  
431 *K. pneumoniae* complex strains. Development of colistin resistance had no, or only a minor, impact on  
432 maximum growth rate in three out of four *in vitro* evolution experiments performed here. This suggests  
433 that colistin may rapidly lose its effectiveness in the treatment of infections caused by multidrug-resistant  
434 *K. pneumoniae* complex strains as fitness costs associated with colistin resistance seem limited.

435 We observe that mutations associated with an increase in MIC of colistin seem confined to genes  
436 from functional groups involved in the synthesis and modification of LPS, and the synthesis of capsular  
437 polysaccharides, which are both important surface-associated structures. In the genes encoding the PhoPQ  
438 two-component regulatory system, which have a role in regulating modifications of LPS and contribute to  
439 colistin resistance in Enterobacteriaceae [30,34,76], we found variations in both PhoP (a D191N  
440 substitution), and PhoQ (a G385S substitution, and a 12-bp deletion). The G385S PhoQ substitution has  
441 previously been described in a clinical strain of colistin-resistant *K. pneumoniae* [73]. Outside PhoPQ, we  
442 found that a novel integration of an IS5 element in the promoter region associated with the genes  
443 encoding CrrAB and CcrC coincides with increase in MIC of colistin. The IS5 element can influence the  
444 transcriptional activity of the genes located near its integration site [77]. The activity of PmrAB may be  
445 influenced by CrrAB through CcrC [31,74,78]. In line with previous observations, in which insertions of  
446 IS elements were associated with resistance to tigecycline and colistin, we hypothesize that the insertion  
447 of IS5 may lead to increased expression of either CrrAB and/or CcrC, and cause colistin resistance  
448 [40,79].

449 For the genes involved in capsule synthesis, we observe that the inactivation of *wzc* of the  
450 K-locus, by the *IS102* element coincides with an increase in the MIC of colistin. In *E. coli*, Wzc is  
451 involved in the synthesis and export of extracellular polysaccharides containing colanic acid [80], but also  
452 the phosphorylation of other endogenous proteins [81]. Wzc has previously been hypothesised to be  
453 involved in colistin resistance in *E. coli*, and it may act similarly in *K. pneumoniae* [81–83]. The loss of  
454 Wzc may potentially cause colistin resistance through two mechanisms. A reduction in the export of  
455 colanic acid units (the building blocks of *K. pneumoniae* capsule), can lead to the accumulation of colanic  
456 acid metabolic intermediates, including UDP-glucuronic acid. This accumulation has been hypothesised  
457 to lead to an increased flux towards biosynthesis of UDP-L-Ara4N, resulting in the modification of  
458 lipid A with L-Ara4N [84]. Alternatively, the absence or reduction of negatively charged colanic acid  
459 residues on the cell surface could lower local concentrations of positively charged colistin molecules,  
460 thereby reducing damage to the outer membrane [84]. Together with the inactivation of *wzc*, we observe a  
461 12-bp insertion in the highly-conserved *rho* gene, encoding the transcription termination factor Rho. Rho  
462 has not been previously linked to colistin resistance, but mutations in *rho* may have pleiotropic effects on  
463 transcription [85], which could influence the expression of genes involved in, or may compensate for  
464 fitness costs caused by, colistin resistance.

465 Notably, we did not find any alterations in *mgrB*, which is an otherwise important mechanism  
466 through which colistin resistance may occur in nosocomial *K. pneumoniae* complex strains [25,36–39].  
467 Nevertheless colistin-resistant clinical *K. pneumoniae* isolates without mutations in *mgrB* are also  
468 frequently encountered [73,74,86–89]. We can only speculate on the reasons for the absence of *mgrB*  
469 mutations in our *in vitro* evolution experiments, but the relatively short duration of this experiment  
470 performed with a limited number of strains, likely implies that we have not covered all potential colistin  
471 resistance mechanisms in *K. pneumoniae*.

472 In this study, we observe the development and fixation of several mutations in systems that are  
473 known to contribute to colistin resistance. We could not however, generate targeted mutants within the

474 clinical strains. The multidrug-resistant nature of these clinical strains, prevents the use of often-used  
475 systems to generate mutations. The impact of developing colistin resistance through the observed  
476 mutations might extend past the inability to treat the infection through antibiotic therapy, as modifications  
477 to lipid A may reduce the susceptibility to antimicrobial peptides, or increase virulence, as we show in  
478 this study [41,65,68,90]. However, the mechanisms behind the differential effects on virulence of colistin  
479 resistance in the *K. pneumoniae* complex are currently not fully understood and are deserving of further  
480 study. A single *K. variicola* isolate was included in this study. While *K. variicola* can cause life-  
481 threatening infections in immunocompromised individuals [5], it remains currently understudied.  
482 Additional studies into the mechanisms of colistin resistance and their impact on fitness and virulence  
483 may be warranted in this species.

484 To prevent the rapid emergence of colistin resistance in *K. pneumoniae* complex strains in  
485 clinical settings, the use of colistin in synergistic combinations with other antibiotics may limit  
486 development of resistance [91]. Additionally, colistin resistance in *K. pneumoniae* may confer collateral  
487 sensitivity to other classes of antibiotics, and may yield combinations of antibiotics that can be used  
488 alternately, in a process termed drug cycling [92,93]. More in-depth knowledge about colistin resistance  
489 mechanisms may also facilitate the development of novel therapeutic targets. Although a diverse set of  
490 two-component systems may be implicated in the development of resistance, the PmrAB two-component  
491 system appears to play a central role since both the PhoPQ and CrrAB two-component systems activate  
492 PmrAB, through PmrD and CrrC respectively [74]. The development of a small-molecule inhibitor  
493 targeting the two-component systems involved in lipid A modifications [94], may be essential to lengthen  
494 the clinical lifespan of colistin as a last-resort drug in treatment of *K. pneumoniae* complex strains.

495



496 **Acknowledgements**

497 We thank the Utrecht Sequence Facility and Ivo Renkens for their expertise in MinION Oxford  
498 Nanopore sequencing, Lidewij W. Rümke for the contribution of clinical metadata of the used nosocomial  
499 isolates, Dr. Inge The for advice on *C. elegans* assays, and Dr. Evelien T.M. Berends for helpful  
500 discussions.

501

502 **Funding**

503 W.v.S. was funded by the Netherlands Organisation for Scientific Research through an Vidi grant  
504 (grant number 917.13.357), and a Royal Society Wolfson Research Merit Award (grant number  
505 WM160092). Work in the laboratory of J.A.B. was supported by the Biotechnology and Biological  
506 Sciences Research Council BBSRC, grant number BB/N00700X/1, BB/P020194/1, and BB/P006078/1)  
507 and a Queen's University Belfast start-up grant. S.H.M.R. was funded by a ERC Starting grant (grant  
508 number 639209-ComBact). The funders had no role in study design, data collection and  
509 interpretation, the decision to submit the work for publication, of manuscript preparation.

510

511 **Author contributions**

512 A.B.J., D.J.D. and G.M. performed experiments and analysed data. A.B.J. and M.R.C.R performed  
513 bioinformatic analyses. S.H.M.R., J.A.B., and W.v.S designed experiments. A.B.J., M.J.M.B, S.H.M.R.,  
514 R.J.L.W., J.A.B. and W.v.S. wrote the manuscript. All authors reviewed and approved the manuscript  
515 prior to submission.

516

517 **References**

- 518 1. Holt KE, Wertheim H, Zadoks RN, Baker S, Whitehouse CA, Dance D, et al. Genomic analysis of  
519 diversity, population structure, virulence, and antimicrobial resistance in *Klebsiella pneumoniae*,  
520 an urgent threat to public health. *Proc Natl Acad Sci U S A*. 2015;112(27):E3574–81.
- 521 2. Rodrigues C, Passet V, Rakotondrasoa A, Diallo TA, Criscuolo A, Brisse S. Description of  
522 *Klebsiella africanensis* sp. nov., *Klebsiella variicola* subsp. *tropicalensis* subsp. nov. and  
523 *Klebsiella variicola* subsp. *variicola* subsp. nov. *Res Microbiol*. 2019;170(3):165–70.
- 524 3. Maatallah M, Vading M, Humaun Kabir M, Bakhrouf A, Kalin M, Nauc ler P, et al. *Klebsiella*  
525 *variicola* is a frequent cause of bloodstream infection in the Stockholm area, and associated with  
526 higher mortality compared to *K. pneumoniae*. *PLoS One*. 2014;9(11):e113539.
- 527 4. Mathers AJ, Crook D, Vaughan A, Barry KE, Vegesana K, Stoesser N, et al. *Klebsiella*  
528 *quasipneumoniae* provides a window into carbapenemase gene transfer, plasmid rearrangements,  
529 and patient interactions with the hospital environment. *Antimicrob Agents Chemother*.  
530 2019;63(6):1–12.
- 531 5. Rodr guez-Medina N, Barrios-Camacho H, Duran-Bedolla J, Garza-Ramos U. *Klebsiella*  
532 *variicola*: an emerging pathogen in humans. *Emerg Microbes Infect*. 2019;8(1):973–88.
- 533 6. World Health Organization. Antimicrobial resistance. Global report on surveillance. 2014.
- 534 7. European Centre for Disease Prevention and Control. Surveillance of antimicrobial resistance in  
535 Europe 2018. Surveillance of antimicrobial resistance in Europe. 2019.
- 536 8. Monaco M, Giani T, Raffone M, Arena F, Garcia-Fernandez A, Pollini S, et al. Colistin resistance  
537 superimposed to endemic carbapenem-resistant *Klebsiella pneumoniae*: a rapidly evolving  
538 problem in Italy, November 2013 to April 2014. *Eurosurveillance*. 2014;19(42):20939.

- 539 9. Parisi SG, Bartolini A, Santacatterina E, Castellani E, Ghirardo R, Berto A, et al. Prevalence of  
540 *Klebsiella pneumoniae* strains producing carbapenemases and increase of resistance to colistin in  
541 an Italian teaching hospital from January 2012 to December 2014. BMC Infect Dis. 2015;15:244.
- 542 10. World Health Organization. 2019 Antibacterial agents in clinical development: an analysis of the  
543 antibacterial clinical development pipeline. 2019.
- 544 11. Shore CK, Coukell A. Roadmap for antibiotic discovery. Nat Microbiol. 2016;1(6):16083.
- 545 12. Llaca-Díaz JM, Mendoza-Olazarán S, Camacho-Ortiz A, Flores S, Garza-González E. One-year  
546 surveillance of ESKAPE pathogens in an intensive care unit of Monterrey, Mexico.  
547 Chemotherapy. 2013;58(6):475–81.
- 548 13. Klein EY, Van Boeckel TP, Martinez EM, Pant S, Gandra S, Levin SA, et al. Global increase and  
549 geographic convergence in antibiotic consumption between 2000 and 2015. Proc Natl Acad Sci.  
550 2018;115(15):E3463–70.
- 551 14. Ozkan G, Ulusoy S, Orem A, Alkanat M, Mungan S, Yulug E, et al. How does colistin-induced  
552 nephropathy develop and can it be treated? Antimicrob Agents Chemother. 2013;57(8):3463–9.
- 553 15. Falagas ME, Kasiakou SK. Colistin: the revival of polymyxins for the management of multidrug-  
554 resistant Gram-negative bacterial infections. Clin Infect Dis. 2005 May 1;40(9):1333–41.
- 555 16. Lim LM, Ly N, Anderson D, Yang JC, Macander L, Jarkowski A, et al. Resurgence of colistin: a  
556 review of resistance, toxicity, pharmacodynamics, and dosing. Pharmacotherapy. 2010  
557 Dec;30(12):1279–91.
- 558 17. Velkov T, Thompson PE, Nation RL, Li J. Structure-activity relationships of polymyxin  
559 antibiotics. J Med Chem. 2010;53(5):1898–916.
- 560 18. Domingues MM, Inácio RG, Raimundo JM, Martins M, Castanho MARB, Santos NC.

- 561 Biophysical characterization of polymyxin B interaction with LPS aggregates and membrane  
562 model systems. *Biopolymers*. 2012 Jul 16;98(4):338–44.
- 563 19. Landman D, Georgescu C, Martin DA, Quale J. Polymyxins revisited. *Clin Microbiol Rev*. 2008  
564 Jul;21(3):449–65.
- 565 20. Blair JMA, Webber MA, Baylay AJ, Ogbolu DO, Piddock LJV. Molecular mechanisms of  
566 antibiotic resistance. *Chem Commun*. 2011;47(14):4055–61.
- 567 21. Putker F, Bos MP, Tommassen J. Transport of lipopolysaccharide to the Gram-negative bacterial  
568 cell surface. *FEMS Microbiol Rev*. 2015;39(6):985–1002.
- 569 22. Sabnis A, Klöckner A, Becce M, Evans LE, Furniss RCD, Mavridou DAI, et al. Colistin kills  
570 bacteria by targeting lipopolysaccharide in the cytoplasmic membrane. *bioRxiv*. 2018;479618.
- 571 23. Walsh TR, Wu Y. China bans colistin as a feed additive for animals. *Lancet Infect Dis*.  
572 2016;16(10):1102–3.
- 573 24. Timmerman T, Dewulf J, Catry B, Feyen B, Opsomer G, Kruif A de, et al. Quantification and  
574 evaluation of antimicrobial drug use in group treatments for fattening pigs in Belgium. *Prev Vet  
575 Med*. 2006;74(4):251–63.
- 576 25. Halaby T, Kucukkose E, Janssen AB, Rogers MRC, Doorduyn DJ, van der Zanden AGM, et al.  
577 Genomic characterization of colistin heteroresistance in *Klebsiella pneumoniae* during a  
578 nosocomial outbreak. *Antimicrob Agents Chemother*. 2016;60(11):6837–43.
- 579 26. Kieffer N, Aires-de-Sousa M, Nordmann P, Poirel L. High rate of MCR-1–producing *Escherichia  
580 coli* and *Klebsiella pneumoniae* among pigs, Portugal. *Emerg Infect Dis*. 2017;23(12):2023–9.
- 581 27. Wang X, Liu Y, Qi X, Wang R, Jin L, Zhao M, et al. Molecular epidemiology of colistin-resistant  
582 Enterobacteriaceae in inpatient and avian isolates from China: high prevalence of *mcr*-negative

- 583 *Klebsiella pneumoniae*. Int J Antimicrob Agents. 2017;50(4):536–41.
- 584 28. Tuo H, Yang Y, Tao X, Liu D, Li Y, Xie X, et al. The prevalence of colistin resistant strains and  
585 antibiotic resistance gene profiles in Funan river, China. Front Microbiol. 2018;9:3094.
- 586 29. Elemam A, Rahimian J, Mandell W. Infection with panresistant *Klebsiella pneumoniae*: a report  
587 of 2 cases and a brief review of the literature. Clin Infect Dis. 2009;49(2):271–4.
- 588 30. Olaitan AO, Morand S, Rolain J-M. Mechanisms of polymyxin resistance: acquired and intrinsic  
589 resistance in bacteria. Front Microbiol. 2014 Nov 26;5:643.
- 590 31. Wright MS, Suzuki Y, Jones MB, Marshall SH, Rudin SD, van Duin D, et al. Genomic and  
591 transcriptomic analyses of colistin-resistant clinical isolates of *Klebsiella pneumoniae* reveal  
592 multiple pathways of resistance. Antimicrob Agents Chemother. 2015;59(1):536–43.
- 593 32. Liu YY, Wang Y, Walsh TR, Yi LX, Zhang R, Spencer J, et al. Emergence of plasmid-mediated  
594 colistin resistance mechanism MCR-1 in animals and human beings in China: a microbiological  
595 and molecular biological study. Lancet Infect Dis. 2016;16(2):161–8.
- 596 33. Nang SC, Li J, Velkov T. The rise and spread of mcr plasmid-mediated polymyxin resistance. Crit  
597 Rev Microbiol. 2019;45(2):131–61.
- 598 34. Poirel L, Jayol A, Nordmann P. Polymyxins: antibacterial activity, susceptibility testing, and  
599 resistance mechanisms encoded by plasmids or chromosomes. Clin Microbiol Rev.  
600 2017;30(2):557–96.
- 601 35. Sun J, Zhang H, Liu YH, Feng Y. Towards understanding MCR-like colistin resistance. Trends  
602 Microbiol. 2018;26(9):794–808.
- 603 36. Cannatelli A, Giani T, D’Andrea MM, Di Pilato V, Arena F, Conte V, et al. MgrB inactivation is a  
604 common mechanism of colistin resistance in KPC carbapenemase-producing *Klebsiella*

- 605 *pneumoniae* of clinical origin. Antimicrob Agents Chemother. 2014 Jul 14;58(July):5696–5703.
- 606 37. Jayol A, Poirel L, Villegas M-V, Nordmann P. Modulation of *mgrB* gene expression as a source of  
607 colistin resistance in *Klebsiella oxytoca*. Int J Antimicrob Agents. 2015 Mar 28;46(1):108–10.
- 608 38. Cannatelli A, Santos-Lopez A, Giani T, Gonzalez-Zorn B, Rossolini GM. Polymyxin resistance  
609 caused by *mgrB* inactivation is not associated with significant biological cost in *Klebsiella*  
610 *pneumoniae*. Antimicrob Agents Chemother. 2015 Feb 17;59(5):2898–900.
- 611 39. Aires CAM, Pereira PS, Asensi MD, Carvalho-Assef APD. MgrB mutations mediating polymyxin  
612 B resistance in *Klebsiella pneumoniae* isolates from rectal surveillance swabs in Brazil.  
613 Antimicrob Agents Chemother. 2016;60(11):6969–72.
- 614 40. Yang T, Wang S, Lin J-E, Griffith BTS, Lian S, Hong Z, et al. Contributions of insertion  
615 sequences conferring colistin resistance in *Klebsiella pneumoniae*. Int J Antimicrob Agents.  
616 2020;53(6):105894.
- 617 41. Kidd TJ, Mills G, Sá-Pessoa J, Dumigan A, Frank CG, Insua JL, et al. A *Klebsiella pneumoniae*  
618 antibiotic resistance mechanism that subdues host defences and promotes virulence. EMBO Mol  
619 Med. 2017;9(4):430–47.
- 620 42. Ni W, Li Y, Guan J, Zhao J, Cui J, Wang R, et al. Effects of efflux pump inhibitors on colistin  
621 resistance in multidrug-resistant Gram-negative bacteria. Antimicrob Agents Chemother.  
622 2016;60(5):3215–8.
- 623 43. Padilla E, Llobet E, Doménech-Sánchez A, Martínez-Martínez L, Bengoechea JA, Albertí S.  
624 *Klebsiella pneumoniae* AcrAB efflux pump contributes to antimicrobial resistance and virulence.  
625 Antimicrob Agents Chemother. 2010 Jan;54(1):177–83.
- 626 44. Mahalakshmi S, Sunayana MR, Saisree L, Reddy M. *yciM* is an essential gene required for

- 627 regulation of lipopolysaccharide synthesis in *Escherichia coli*. *Mol Microbiol*. 2014;91(1):145–57.
- 628 45. Llobet E, Tomás JM, Bengoechea JA. Capsule polysaccharide is a bacterial decoy for  
629 antimicrobial peptides. *Microbiology*. 2008;154(12):3877–86.
- 630 46. Campos MA, Vargas MA, Regueiro V, Llompert CM, Albertí S, Bengoechea JA. Capsule  
631 polysaccharide mediates bacterial resistance to antimicrobial peptides. *Infect Immun*.  
632 2004;72(12):7107–14.
- 633 47. Needham BD, Trent MS. Fortifying the barrier: the impact of lipid A remodelling on bacterial  
634 pathogenesis. *Nat Rev Microbiol*. 2013;11(7):467–81.
- 635 48. Gruenheid S, Le Moual H. Resistance to antimicrobial peptides in Gram-negative bacteria. *FEMS*  
636 *Microbiol Lett*. 2012 May;330(2):81–9.
- 637 49. Maeshima N, Fernandez RC. Recognition of lipid A variants by the TLR4-MD-2 receptor  
638 complex. *Front Cell Infect Microbiol*. 2013;3(February):3.
- 639 50. Raetz CR, Reynolds MC, Trent SM, Bishop RE. Lipid A modification in Gram-negative bacteria.  
640 *Annu Rev Biochem*. 2007;76(3):295–329.
- 641 51. Doorduyn DJ, Rooijackers SHM, van Schaik W, Bardoel BW. Complement resistance  
642 mechanisms of *Klebsiella pneumoniae*. *Immunobiology*. 2016;221(10):1102–9.
- 643 52. Matsuura M. Structural modifications of bacterial lipopolysaccharide that facilitate Gram-negative  
644 bacteria evasion of host innate immunity. *Front Immunol*. 2013;4:109.
- 645 53. Andrews JM. Determination of minimum inhibitory concentrations. *J Antimicrob Chemother*.  
646 2001 Jul;48:5–16.
- 647 54. Satlin MJ, Weinstein MP, Patel J, Romney M, Kahlmeter G, Giske CG, et al. Clinical and  
648 Laboratory Standards Institute (CLSI) and European Committee on Antimicrobial Susceptibility

- 649 Testing (EUCAST) position statements on polymyxin B and colistin clinical breakpoints. Clin  
650 Infect Dis. 2020;
- 651 55. Loman NJ, Quinlan AR. Poretools: a toolkit for analyzing nanopore sequence data.  
652 Bioinformatics. 2014;30(23):3399–401.
- 653 56. van Mansfeld R, de Been M, Paganelli F, Yang L, Bonten M, Willems R. Within-host evolution of  
654 the Dutch high-prevalent *Pseudomonas aeruginosa* clone ST406 during chronic colonization of a  
655 patient with cystic fibrosis. PLoS One. 2016;11(6):e0158106.
- 656 57. Bankevich A, Nurk S, Antipov D, Gurevich AA, Dvorkin M, Kulikov AS, et al. SPAdes: a new  
657 genome assembly algorithm and its applications to single-cell sequencing. J Comput Biol. 2012  
658 May;19(5):455–77.
- 659 58. Seemann T. Prokka: rapid prokaryotic genome annotation. Bioinformatics. 2014;30(14):2068–9.
- 660 59. Zankari E, Hasman H, Cosentino S, Vestergaard M, Rasmussen S, Lund O, et al. Identification of  
661 acquired antimicrobial resistance genes. J Antimicrob Chemother. 2012;67:2640–4.
- 662 60. Langmead B, Salzberg SL. Fast gapped-read alignment with Bowtie 2. Nat Methods. 2012  
663 Apr;9(4):357–9.
- 664 61. Li H, Handsaker B, Wysoker A, Fennell T, Ruan J, Homer N, et al. The Sequence Alignment/Map  
665 format and SAMtools. Bioinformatics. 2009 Aug 15;25(16):2078–9.
- 666 62. Siguiet P, Perochon J, Lestrade L, Mahillon J, Chandler M. ISfinder: the reference centre for  
667 bacterial insertion sequences. Nucleic Acids Res. 2006;34:D32–6.
- 668 63. Hawkey J, Hamidian M, Wick RR, Edwards DJ, Billman-Jacobe H, Hall RM, et al. ISMapper:  
669 Identifying transposase insertion sites in bacterial genomes from short read sequence data. BMC  
670 Genomics. 2015;16(1):667.



- 671 64. Briskine R V., Shimizu KK. Positional bias in variant calls against draft reference assemblies.  
672 BMC Genomics. 2017;18(1):263.
- 673 65. Llobet E, Martínez-Moliner V, Moranta D, Dahlström KM, Regueiro V, Tomás A, et al.  
674 Deciphering tissue-induced *Klebsiella pneumoniae* lipid A structure. Proc Natl Acad Sci U S A.  
675 2015 Nov 2;112(46):E6369–E6378.
- 676 66. Llobet E, Campos MA, Giménez P, Moranta D, Bengoechea JA. Analysis of the networks  
677 controlling the antimicrobial-peptide-dependent induction of *Klebsiella pneumoniae* virulence  
678 factors. Infect Immun. 2011;79(9):3718–32.
- 679 67. El Hamidi A, Tirsoaga A, Novikov A, Hussein A, Caroff M. Microextraction of bacterial lipid A:  
680 easy and rapid method for mass spectrometric characterization. J Lipid Res. 2005;46(8):1773–8.
- 681 68. Napier BA, Burd EM, Satola SW, Cagle SM, Ray SM, McGann P, et al. Clinical use of colistin  
682 induces cross-resistance to host antimicrobials in *Acinetobacter baumannii*. MBio.  
683 2013;4(3):e00021-13.
- 684 69. Brenner S. The genetics of *Caenorhabditis elegans*. Genetics. 1974;77(1):95–104.
- 685 70. Kurz CL, Chauvet S, Andrès E, Aurouze M, Vallet I, Michel GPF, et al. Virulence factors of the  
686 human opportunistic pathogen *Serratia marcescens* identified by *in vivo* screening. EMBO J. 2003  
687 Apr 1;22(7):1451–60.
- 688 71. Porta-de-la-Riva M, Fontrodona L, Villanueva A, Cerón J. Basic *Caenorhabditis elegans* methods:  
689 synchronization and observation. J Vis Exp. 2012;64(64):e4019.
- 690 72. Jeannot K, Bolard A, Plesiat P. Resistance to polymyxins in Gram-negative organisms. Int J  
691 Antimicrob Agents. 2017;49(5):526–35.
- 692 73. Olaitan AO, Diene SM, Kempf M, Berrazeg M, Bakour S, Gupta SK, et al. Worldwide emergence

- 693 of colistin resistance in *Klebsiella pneumoniae* from healthy humans and patients in Lao PDR,  
694 Thailand, Israel, Nigeria and France owing to inactivation of the PhoP/PhoQ regulator *mgrB*: an  
695 epidemiological and molecular study. *Int J Antimicrob Agents*. 2014;44(6):500–7.
- 696 74. Cheng Y-H, Lin T-L, Lin Y-T, Wang J-T. Amino acid substitutions of CrrB responsible for  
697 resistance to colistin through CrrC in *Klebsiella pneumoniae*. *Antimicrob Agents Chemother*.  
698 2016;60(6):3709–16.
- 699 75. Simpson BW, Trent MS. Pushing the envelope: LPS modifications and their consequences. *Nat*  
700 *Rev Microbiol*. 2019;17:403–16.
- 701 76. Li J, Nation RL, Kaye KS. Polymyxin antibiotics: from laboratory bench to bedside. 2019.
- 702 77. Schnetz K, Rak B. IS5: a mobile enhancer of transcription in *Escherichia coli*. *Proc Natl Acad Sci*.  
703 1992;89:1244–8.
- 704 78. Aghapour Z, Gholizadeh P, Ganbarov K, Bialvaei AZ, Mahmood SS, Tanomand A, et al.  
705 Molecular mechanisms related to colistin resistance in Enterobacteriaceae. *Infect Drug Resist*.  
706 2019;12:965–75.
- 707 79. Nielsen LE, Snesrud EC, Onmus-Leone F, Kwak YI, Avilés R, Steele ED, et al. IS5 element  
708 integration, a novel mechanism for rapid *in vivo* emergence of tigecycline nonsusceptibility in  
709 *Klebsiella pneumoniae*. *Antimicrob Agents Chemother*. 2014;58(10):6151–6.
- 710 80. Whitfield C. Biosynthesis and assembly of capsular polysaccharides. *Annu Rev Biochem*.  
711 2006;75:39–68.
- 712 81. Lacour S, Bechet E, Cozzone AJ, Mijakovic I, Grangeasse C. Tyrosine phosphorylation of the  
713 UDP-glucose dehydrogenase of *Escherichia coli* is at the crossroads of colanic acid synthesis and  
714 polymyxin resistance. *PLoS One*. 2008;3(8):e3053.

- 715 82. Obadia B, Lacour S, Doublet P, Baubichon-Cortay H, Cozzone AJ, Grangeasse C. Influence of  
716 tyrosine-kinase Wzc activity on colanic acid production in *Escherichia coli* K12 cells. *J Mol Biol.*  
717 2007;367(1):42–53.
- 718 83. Grangeasse C, Obadia B, Mijakovic I, Deutscher J, Cozzone AJ, Doublet P. Autophosphorylation  
719 of the *Escherichia coli* protein kinase Wzc regulates tyrosine phosphorylation of Ugd, a UDP-  
720 glucose dehydrogenase. *J Biol Chem.* 2003;278(41):39323–9.
- 721 84. Pal S, Verma J, Mallick S, Rastogi SK, Kumar A, Ghosh AS. Absence of the glycosyltransferase  
722 WcaJ in *Klebsiella pneumoniae* ATCC13883 affects biofilm formation, increases polymyxin  
723 resistance and reduces murine macrophage activation. *Microbiology.* 2019;165(8):891–904.
- 724 85. Ciampi MS. Rho-dependent terminators and transcription termination. *Microbiology.*  
725 2006;152(9):2515–28.
- 726 86. Jayol A, Poirel L, Brink A, Villegas M-V, Yilmaz M, Nordmann P. Resistance to colistin  
727 associated with a single amino acid change in protein PmrB among *Klebsiella pneumoniae* isolates  
728 of worldwide origin. *Antimicrob Agents Chemother.* 2014 Aug;58(8):4762–6.
- 729 87. Cheng Y-H, Lin T-L, Pan Y-J, Wang Y-P, Lin Y-T, Wang J-T. Colistin-resistant mechanisms of  
730 *Klebsiella pneumoniae* in Taiwan. *Antimicrob Agents Chemother.* 2015 Feb 17;59(5):2909–13.
- 731 88. Choi MJ, Ko KS. Mutant prevention concentrations of colistin for *Acinetobacter baumannii*,  
732 *Pseudomonas aeruginosa* and *Klebsiella pneumoniae* clinical isolates. *J Antimicrob Chemother.*  
733 2014;69(1):275–7.
- 734 89. Cheong HS, Kim SY, Wi YM, Peck KR, Ko KS. Colistin heteroresistance in *Klebsiella*  
735 *pneumoniae* isolates and diverse mutations of PmrAB and PhoPQ in resistant subpopulations. *J*  
736 *Clin Med.* 2019;8(9):1444.

- 737 90. Mills G, Dumigan A, Kidd T, Hopley L, Bengoechea JA. Identification and characterization of  
738 two *Klebsiella pneumoniae* *lpxL* lipid A late acyltransferases and their role in virulence. *Infect*  
739 *Immun.* 2017;85(9):e00068-17.
- 740 91. Brochado AR, Telzerow A, Bobonis J, Banzhaf M, Mateus A, Selkrig J, et al. Species-specific  
741 activity of antibacterial drug combinations. *Nature.* 2018;559(7713):259–63.
- 742 92. Imamovic L, Sommer MOA. Use of collateral sensitivity networks to design drug cycling  
743 protocols that avoid resistance development. *Sci Transl Med.* 2013;5(204):204ra132.
- 744 93. Imamovic L, Ellabaan MMH, Dantas Machado AM, Citterio L, Wulff T, Molin S, et al. Drug-  
745 driven phenotypic convergence supports rational treatment strategies of chronic infections. *Cell.*  
746 2018;172(1–2):121-134.e14.
- 747 94. Gotoh Y, Eguchi Y, Watanabe T, Okamoto S, Doi A, Utsumi R. Two-component signal  
748 transduction as potential drug targets in pathogenic bacteria. *Curr Opin Microbiol.*  
749 2010;13(2):232–9.
- 750

751 **Figure and table legends**

752 **Figure 1**

753 ***K. pneumoniae* complex strains: metadata, presence of antibiotic resistance genes, and**  
754 **core-genome phylogenetic analysis.** A) Overview of the isolates used in this study, including the date  
755 and source of isolation, MLST type, and the initial MIC determined. MLST typing of strain KV402  
756 resulted in an incomplete MLST profile, so no conclusive ST could be assigned. NA, not applicable. B)  
757 Antibiotic resistance genes detected in *K. pneumoniae* complex strains sequenced as part of this study.  
758 Classes of antibiotic resistance genes are indicated as follow: BLA, beta-lactam resistance genes; QLN,  
759 quinolone resistance genes; FOS, fosfomycin resistance genes. The strains did not carry acquired colistin  
760 resistance genes of the *mcr*-family. C) Midpoint-rooted phylogenetic tree representing the 1.3-Mbp  
761 core-genome alignment of 41 *K. pneumoniae* complex. Taxonomic phylogroups of the *K. pneumoniae*  
762 complex [2] are indicated along the branches. The strains used in this study are highlighted in red.

763

764 **Figure 2**

765 **Population analysis of mutations during *in vitro* evolution in the presence of colistin.** For  
766 each strain, and each day of the *in vitro* evolution experiment, the positions that have mutated compared  
767 to the colistin-susceptible strain are indicated. For SNPs and indels, the number of reads supporting a  
768 mutation at a given location was used to estimate the abundance of the mutation. Novel integrations of IS  
769 elements are also indicated. For mutations not located in a coding sequence, nearby coding sequences are  
770 indicated. Mutations and IS element integrations observed in the axenic, strain isolated daily from each  
771 population are indicated by a blue border. The MIC of colistin for each axenic strain isolated from the  
772 *in vitro* evolution population is indicated. The MIC values represent the mode from three independent  
773 experiments performed in duplo. Hyp. protein: hypothetical protein.

774

775 **Figure 3**

776 **Maximum growth rate of colistin resistant evolved strains.** Optical density at 600 nm (OD<sub>600</sub>)  
777 was measured every 7.5 minutes. Representative data of three individual experiments, performed in  
778 triplicate are shown. Mean and standard deviations are shown. A parametric one-way ANOVA with  
779 Dunnett's multiple correction was used for the statistical analysis of the differences in growth rates  
780 between the axenic strains isolated from each day of the *in vitro* evolution experiment and the  
781 colistin-susceptible parental strain. Outcomes of the statistical analysis are indicated by asterisks:  $p < 0.05$   
782 (\*),  $< 0.01$  (\*\*),  $< 0.001$  (\*\*\*), or  $< 0.0001$  (\*\*\*\*).

783

784

785 **Figure 4**

786 **Lipid A modifications in colistin-susceptible and colistin-resistant strains.** MALDI-TOF  
787 spectra showing the mass-to-charge (m/z) ratio values of the isolated lipid A from (A)  
788 colistin-susceptible, and (B) colistin-resistant axenic strains, isolated from the cultures of the last day of  
789 the *in vitro* evolution experiment. C) Proposed chemical structures of lipid A-moieties corresponding to  
790 the observed m/z-values in the MALDI-TOF spectra. Modifications relative to the unmodified  
791 hexa-acylated lipid A corresponding to m/z value 1824 are depicted in red. Hydroxylation of an acyl-  
792 chain adds 16 to the m/z ratio, 4-amino-4-deoxy-L-arabinose adds 131, acylation with palmitate adds 239.

793

794 **Figure 5**

795 **Susceptibility of colistin-susceptible and colistin-resistant strains to the human cathelicidin**  
796 **LL-37.** Strains were incubated for 90 minutes in 25% LB at 37°C with or without the addition of 50  
797 µg/ml LL-37. Viability was assessed by determination of the number of colony-forming units. The

798 non-parametric Mann-Whitney test was used as statistical test and significance was defined as a p-value  
799 of < 0.05 (\*), < 0.01 (\*\*), <0.001 (\*\*\*), or <0.0001 (\*\*\*\*).

800

## 801 **Figure 6**

802 **Survival of *C. elegans* on lawns of *K. pneumoniae* colistin-susceptible and colistin-resistant**  
803 **strains complex strains.** *C. elegans* CF512 were kept on a lawn of colistin-susceptible (green) and  
804 colistin-resistant (red) *K. pneumoniae* complex strains. Survival was scored over a period of 15 days. The  
805 data represent three independent experiments in which a total of 129 (in colistin-susceptible KP209), 118  
806 (colistin-resistant KP209), 106 (colistin-susceptible KP040), 127 (colistin-resistant KP040), 127  
807 (colistin-susceptible KP257), 131 (colistin-resistant KP257), 100 (colistin-susceptible KP402), and 102  
808 (colistin-resistant KP402) *C. elegans* nematodes were used. Statistical significance according to  
809 Mantel-Cox log-rank test is indicated. Statistical significance was defined as a p-value < 0.05.

810

## 811 **Supplemental Table S1**

812 **Sequences of oligonucleotide primers.** The name indicates the specific strain and target site of  
813 the primer. The nucleic acid sequence (5'-3') is indicated.

814

## 815 **Supplemental Table S2**

816 **Summary of the read data from the sequencing runs, and genome assembly information.**  
817 Per strain, the sequenced samples are indicated. The axenic colistin-resistant strain was picked from the  
818 last day of the *in vitro* evolution experiment. For the colistin-susceptible parental strain, the assembly  
819 statistics for the Illumina/Oxford Nanopore hybrid genome assembly are indicated. For all samples, the

820 number of reads mapped to the hybrid assembly of the colistin-susceptible parental strain, and the average  
821 coverage are indicated. NA, not applicable

822

### 823 **Supplemental Table S3**

824 **Mutations observed in the populations of the *in vitro* evolution experiment.** The positions that  
825 were observed to have mutated through a SNP or indel in the populations cultured in the presence of  
826 colistin, compared to the colistin-susceptible strain, are indicated. For each SNP or indel, the strain in  
827 which it was found, the associated genes, the location in the specific scaffold of the Illumina/Oxford  
828 Nanopore hybrid genome assembly, the reference allele, and the mutant allele are indicated. If the  
829 mutation was observed in a coding sequence, the change in the coding sequence of the affected gene is  
830 indicated. The residues are numbered according to their position in the reference allele. For mutations not  
831 located in a coding sequence, the associated genes are indicated. Hyp. protein; hypothetical protein.

832

### 833 **Supplemental Table S4**

834 **Overview of location of IS elements.** Position of IS elements as determined by ISMapper in the colistin-  
835 susceptible and colistin-resistant strains (isolated on the last day of the *in vitro* evolution experiments).  
836 The result of ISMapper was classified as excision, novel integration, or stable per IS element. Events  
837 were classified compared to the Illumina/Oxford Nanopore hybrid genome assembly of the  
838 colistin-susceptible strain. For IS elements with an excision, or novel integration, the changed position  
839 was checked through targeted PCRs (Supplemental Figure S1) and Sanger sequencing in all isolates  
840 collected during the *in vitro* evolution experiment. NA: not applicable.

841



842 **Supplemental Table S5**

843 **Mutations observed in whole-genome sequence of axenic colistin-resistant strains.** For each  
844 strain, the positions that have been mutated between the colistin-susceptible strain, and the  
845 colistin-resistant strain picked from the last day of culturing are indicated. For each mutation, the  
846 associated feature, the location in the specific scaffold of the Illumina/Oxford Nanopore hybrid genome  
847 assembly are indicated, the reference allele and the mutant allele are indicated. If the mutation was  
848 observed in a coding sequence, the changes in the coding sequence of the affected gene are indicated. The  
849 residues are numbered according to their position in the reference allele. For mutations not located in a  
850 coding sequence, the associated coding sequences are indicated.

851

852 **Supplemental Figure S1**

853 **Design of, and concentration of colistin used during, the *in vitro* evolution experiment.**

854 *In vitro* evolution to colistin resistance was achieved by culturing in increasing colistin concentrations  
855 over a period of 5-7 days. Prior to the *in vitro* evolution experiments, MICs to colistin were determined in  
856 LB. Each strain was grown in 1 ml LB with initial colistin concentrations of 1 and 2 times the MIC. After  
857 overnight growth, 1 µl of the cultures with the highest concentration of colistin that had visible growth  
858 were used to propagate a fresh culture by inoculating 1 ml of fresh LB, supplemented with the same or  
859 twice the concentration of colistin in which growth was observed in the previous day's culture. This  
860 process was repeated for 5-7 days. Each overnight culture was stored at -80°C in 20% glycerol. B)  
861 Colistin concentrations used during *in vitro* evolution experiments. A green background indicates the  
862 observation of growth after overnight incubation at 37°C, red indicates no observable growth. The  
863 cultures from which the concentration is underlined, were used to propagate the *in vitro* evolution  
864 experiment. If no growth was observed in both cultures, cultures were re-inoculated from -80°C stocks of

865 the susceptible strain (only when no growth was observed on day 1), or from cultures stored from the  
866 previous day.

867

868

869

## 870 **Supplemental Figure S2**

871 **Agarose gel electrophoresis to determine integration sites of IS elements.** PCR reactions were  
872 performed to validate the ISMapper results suggesting IS element excision or integration between the  
873 colistin-susceptible parental strains and the colistin-resistant strains of strains KP209 (**A**), KP040 (**B**), and  
874 KP257 (**C**), from the last day of the *in vitro* evolution experiment. PCR reactions were performed using  
875 primers spanning the integration site of each IS element (Supplemental Table S1). The 1 kb plus DNA  
876 ladder (Thermo Scientific) was used for size comparison. The order of samples in each agarose gel  
877 electrophoreses is: 1 kb plus DNA ladder, colistin-susceptible strain, axenic strain of the last day of the  
878 *in vitro* evolution experiment, 1 kb plus ladder, colistin susceptible strain, axenic strain for each day of the  
879 *in vitro* evolution experiment, 1 kb plus ladder, negative water control. The order for *ISEhe3* was: 1 kb  
880 plus marker, colistin susceptible strain, axenic strain for each day of the *in vitro* evolution experiment, 1  
881 kb plus ladder colistin susceptible strain, axenic strain for each day of the *in vitro* evolution experiment, 1  
882 kb plus ladder.

**A**

| Strain | Date of isolation | Isolation source | MLST type | MIC of colistin (mg/L) | Reference  |
|--------|-------------------|------------------|-----------|------------------------|------------|
| KP209  | 17-09-2013        | Urine            | 11        | 0.5                    | This study |
| KP040  | 09-09-2013        | Faeces           | 10        | 1                      | This study |
| KP257  | 27-09-2013        | Pus              | 3030      | 1                      | This study |
| KV402  | 19-09-2013        | Urine            | NA        | 0.5                    | This study |

**B**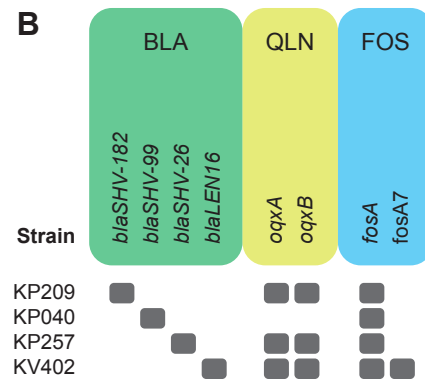**C**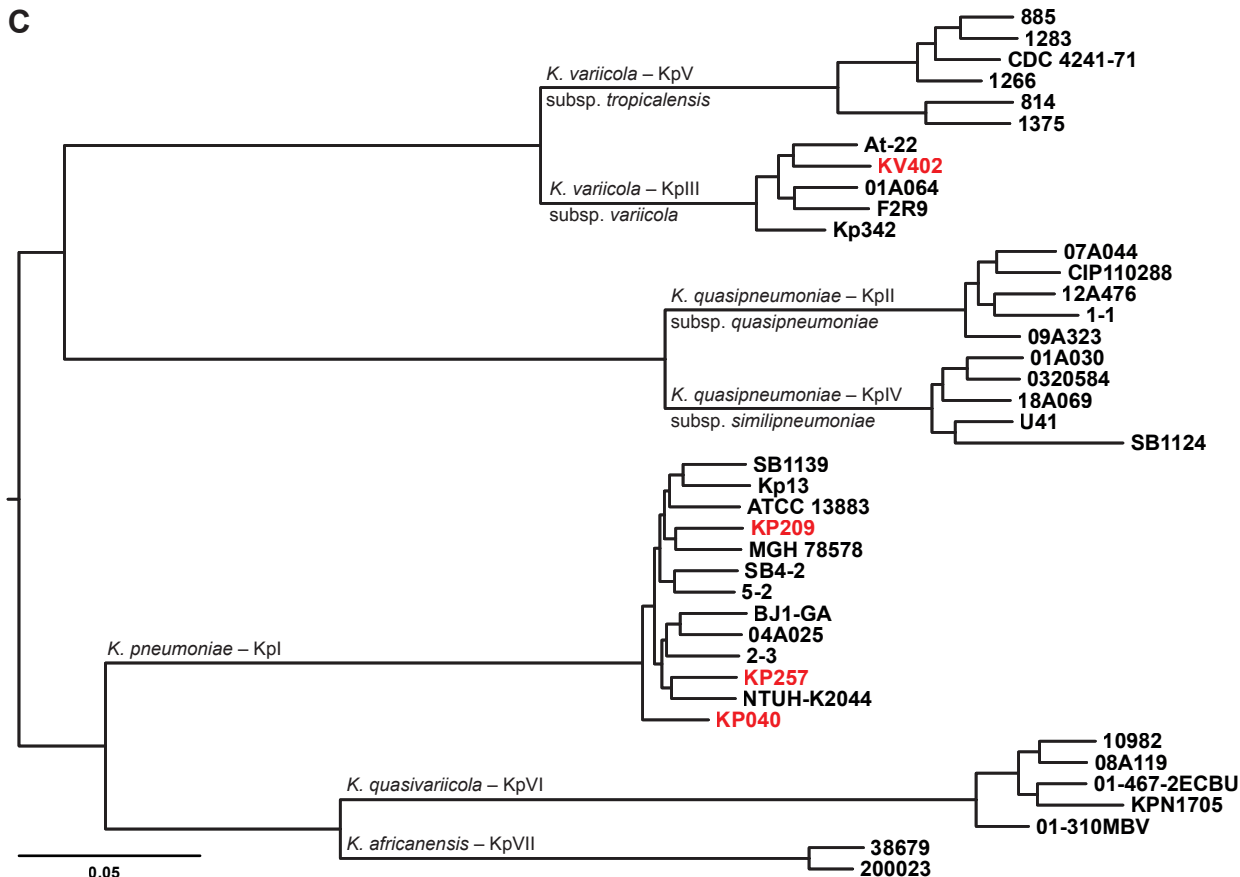

## KP209

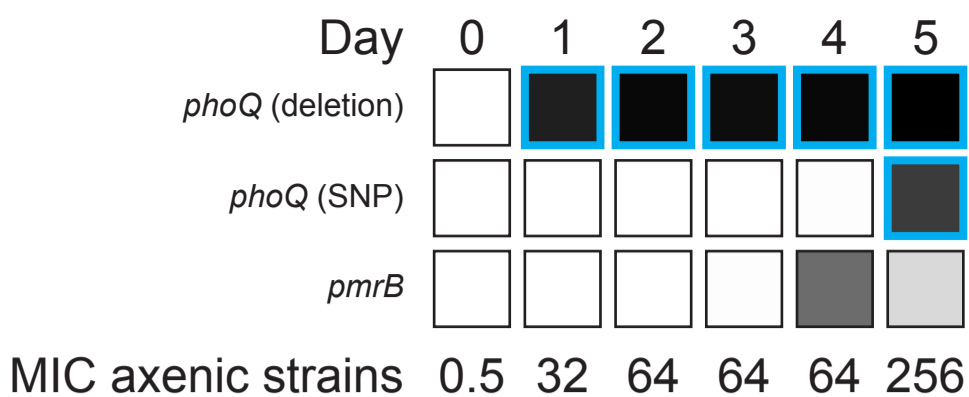

## KP040

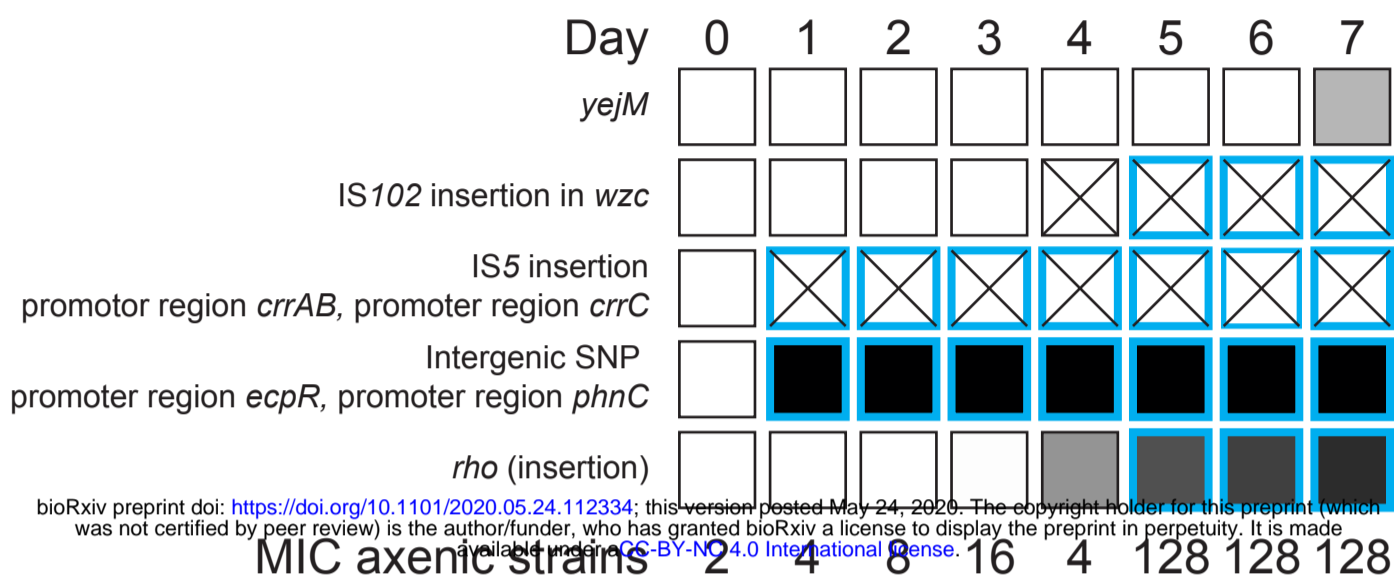

bioRxiv preprint doi: <https://doi.org/10.1101/2020.05.24.112334>; this version posted May 24, 2020. The copyright holder for this preprint (which was not certified by peer review) is the author/funder, who has granted bioRxiv a license to display the preprint in perpetuity. It is made available under aCC-BY-NC 4.0 International license.

## KP257

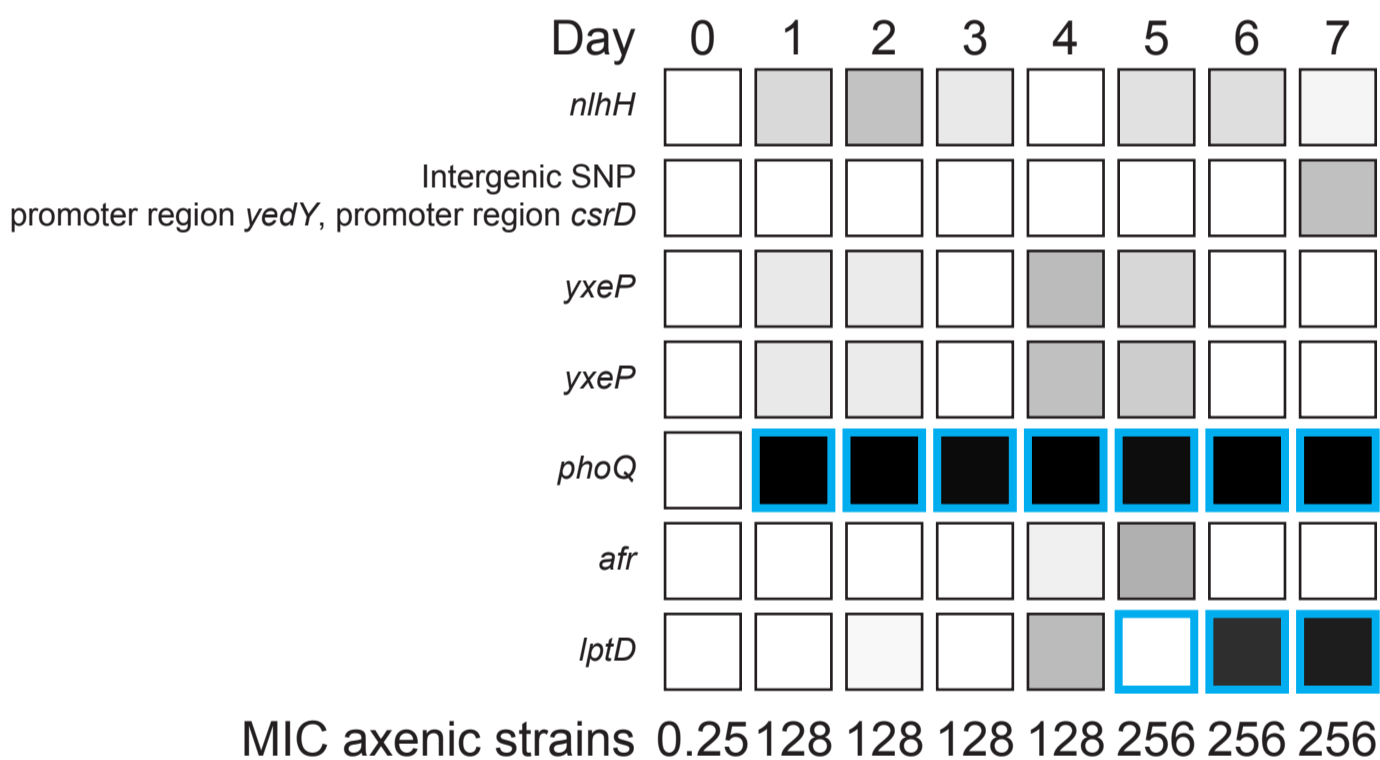

## KV402

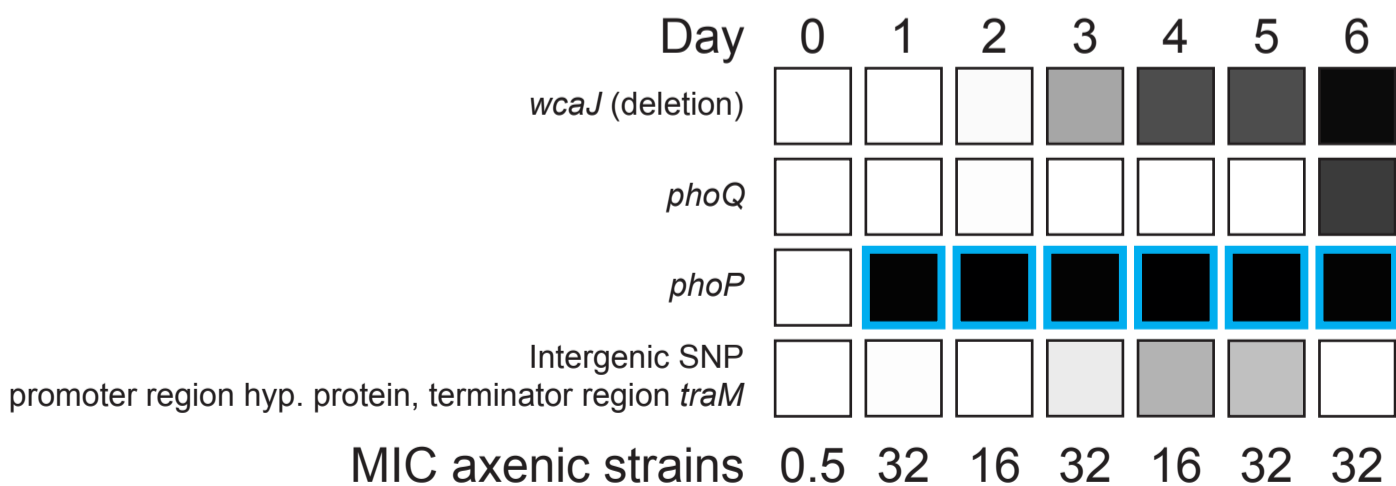

0% Reads supporting mutation 100%

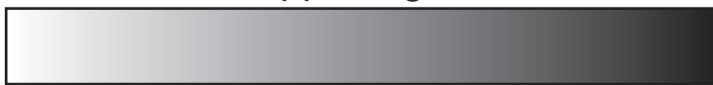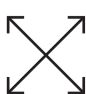

Insertion of IS element

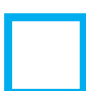

Mutation observed in axenic strain isolated from this population

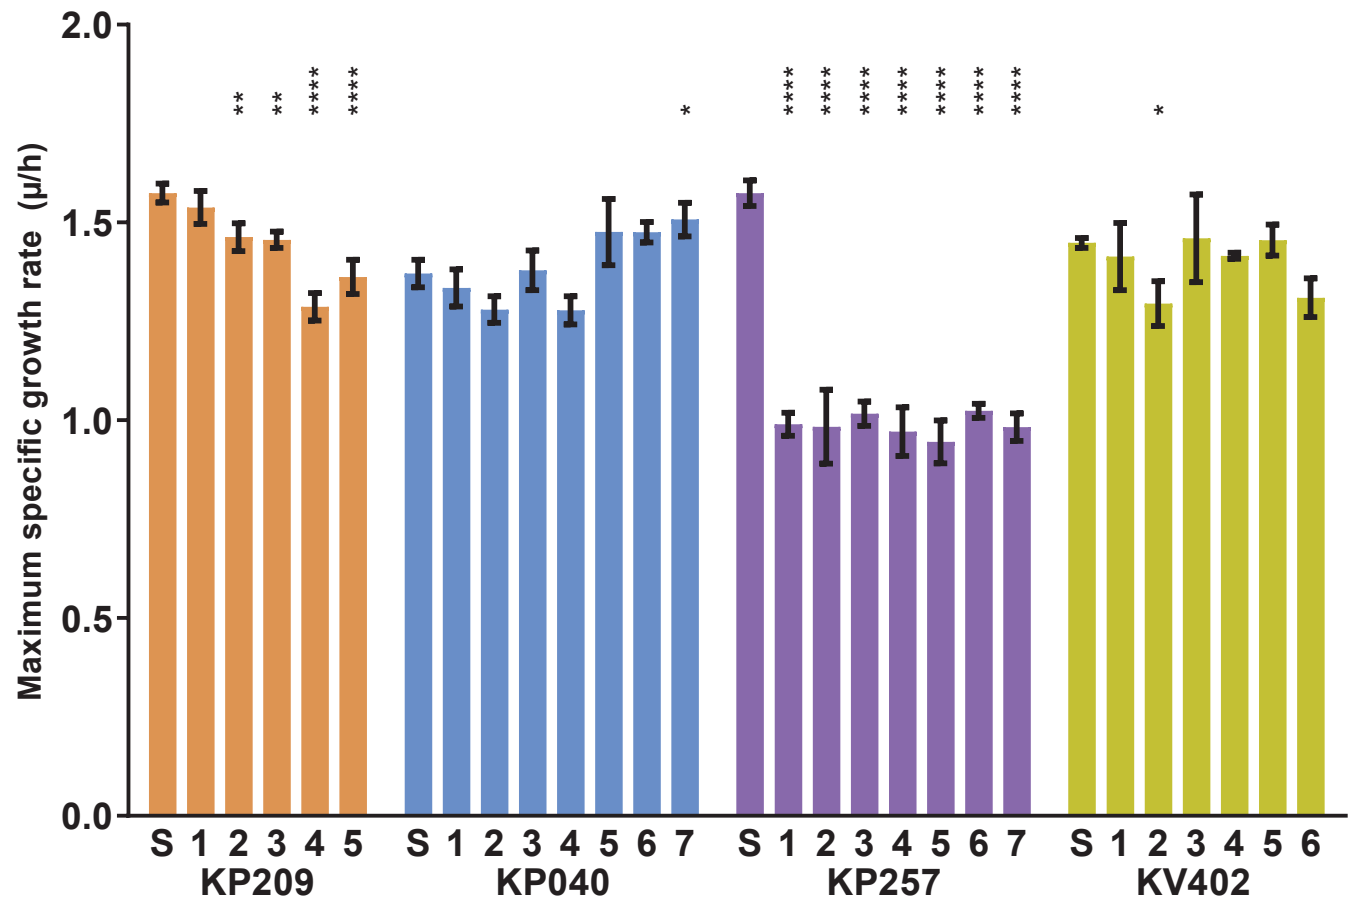

**A**

colistin-susceptible

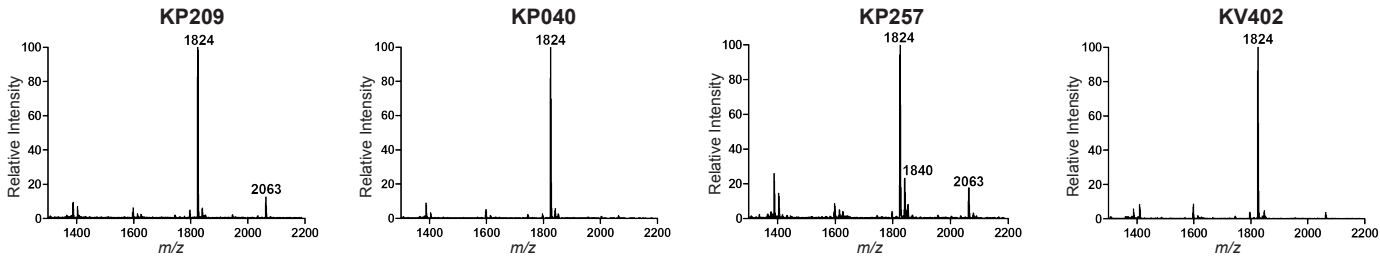**B**

colistin-resistant

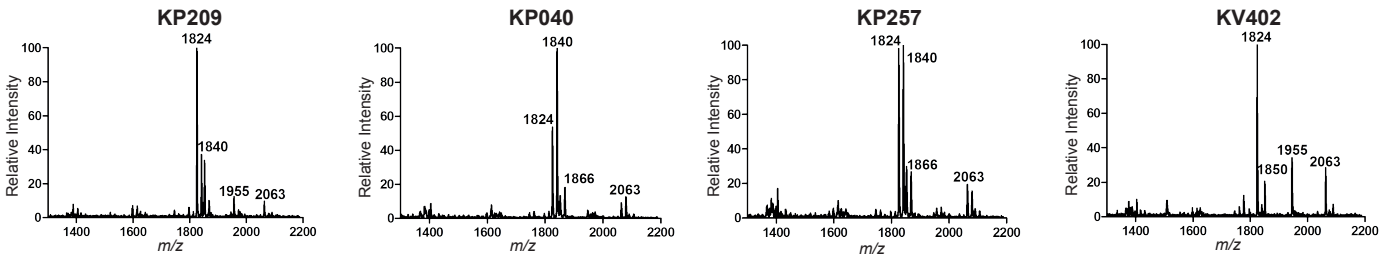**C**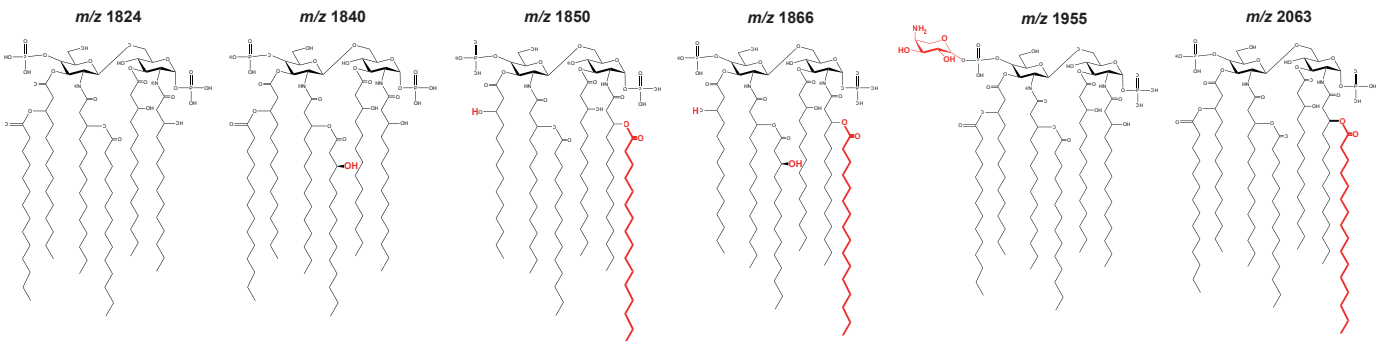

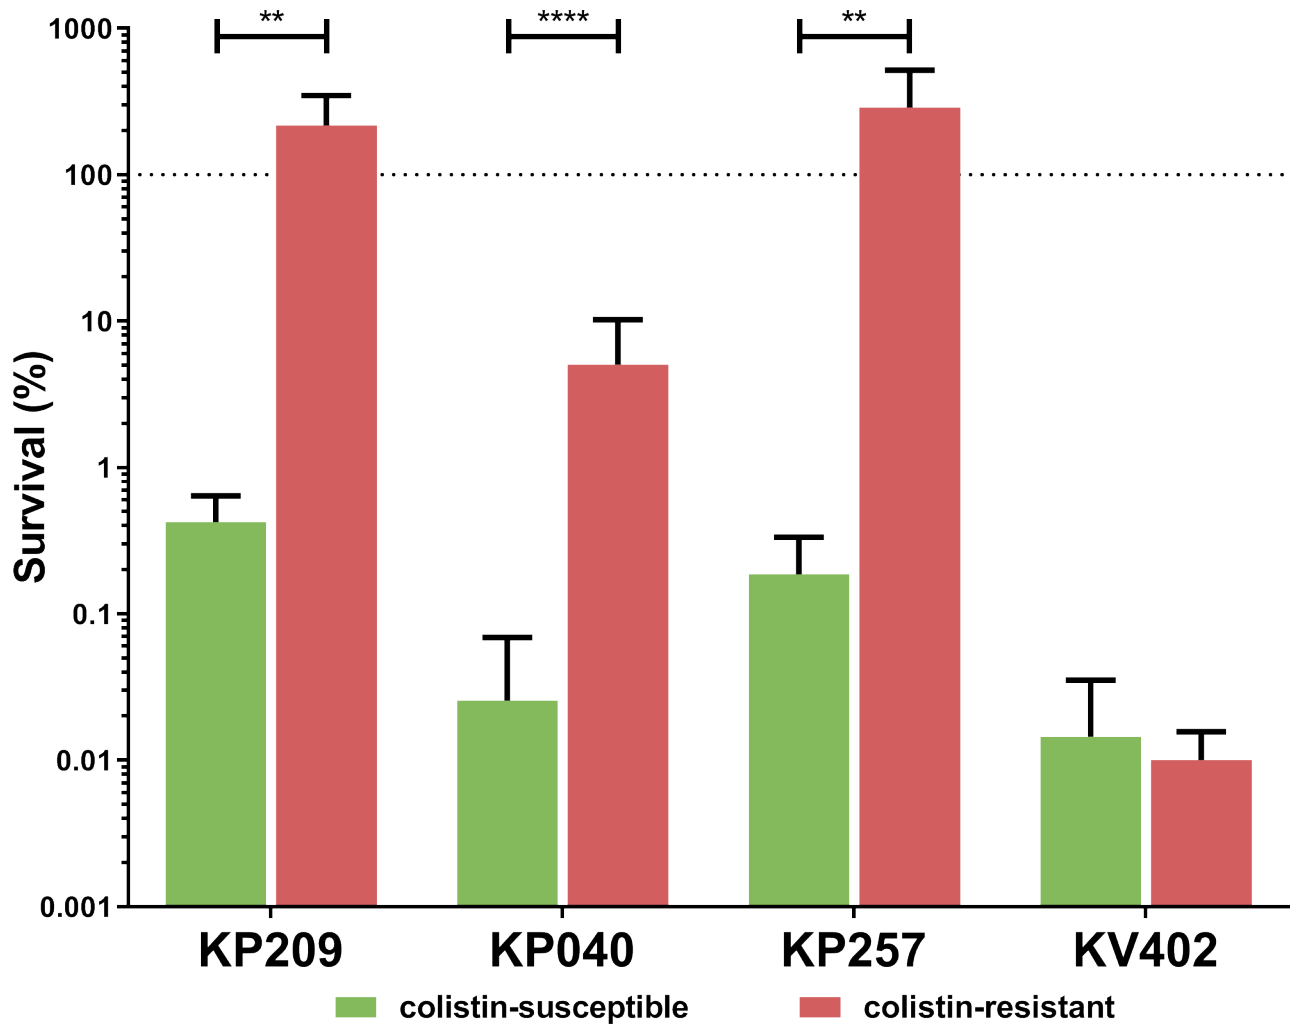

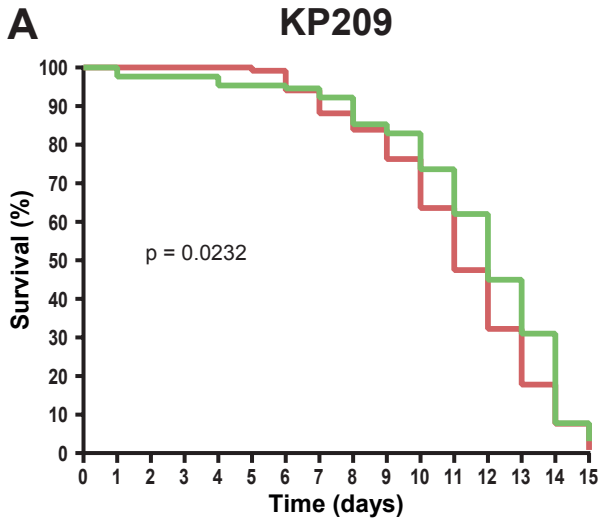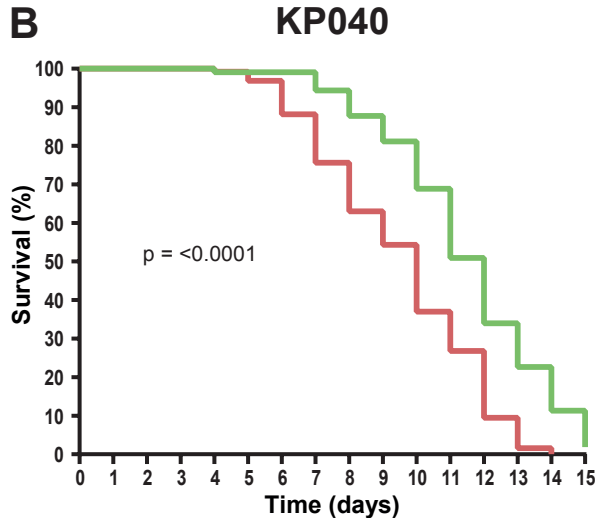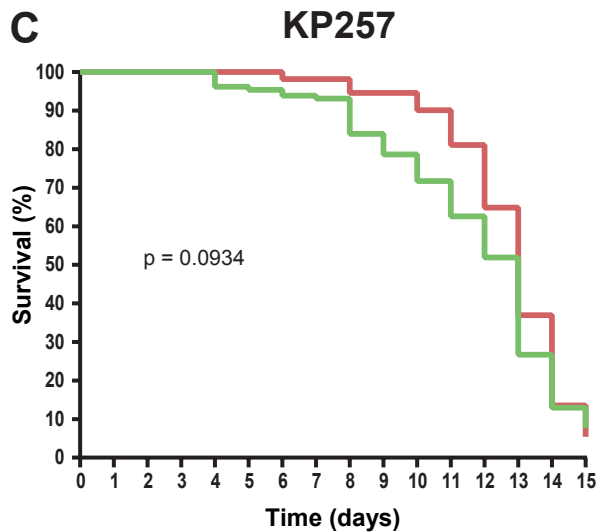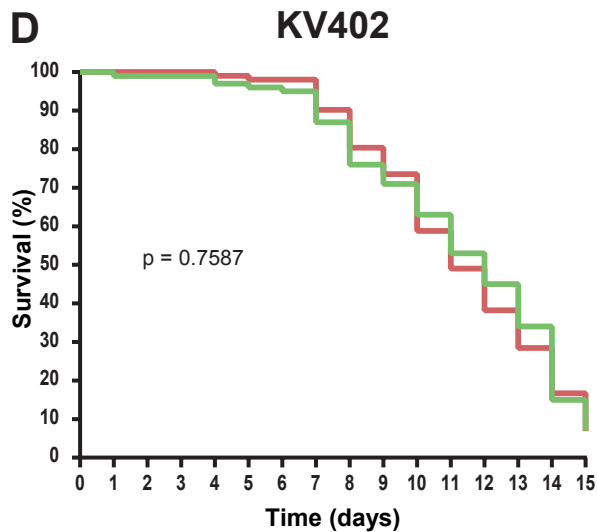

— Colistin-susceptible

— Colistin-resistant
